# Supplementary material for: Divergent catalytic behaviors of assembled organogold(i) clusters derived from enyne cyclization
Source: Royal Society of Chemistry journal article supplement (doi:10.1039/d4sc01618a), 2024-01-01
Supplement: d4sc01618a1.pdf [file d4sc01618a1.pdf]

## Supplementary Information

### **Divergent Catalytic Behaviors of Assembled Organogold(I) Clusters Derived from Enyne Cyclization**

Qian Liu, Xiaoyi Zhai, Ruijun Jian, and Liang Zhao\*

Key Laboratory of Bioorganic Phosphorus Chemistry and Chemical Biology (Ministry of Education),  
Department of Chemistry, Tsinghua University, Beijing 100084, China.

E-mail: zhaolchem@mail.tsinghua.edu.cn; Phone: +86-10-62786635.

#### **Table of Contents**

|                                  |     |
|----------------------------------|-----|
| 1. Supplementary Methods .....   | S2  |
| 2. Supplementary Figures .....   | S6  |
| 3. Supplementary References..... | S44 |

## Synthesis of $\sigma$ -aurated substrates **1a-1c, 3-3'**.

### Synthesis of **1a**

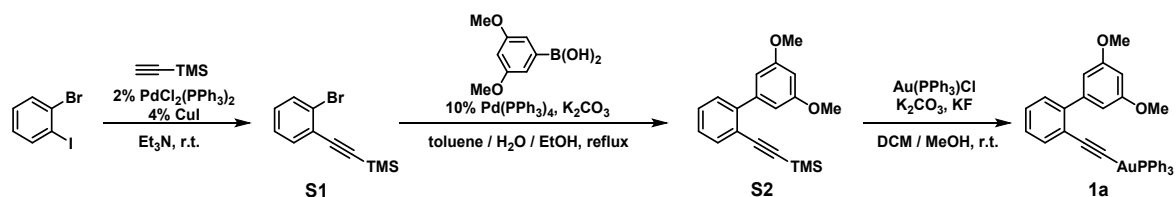

**S1**, **S2** were prepared according to literature procedures.<sup>1,2</sup> **S2** (34.2 mg, 0.11 mmol) and Au(PPh<sub>3</sub>)Cl (49.5 mg, 0.1 mmol) were dissolved in CH<sub>2</sub>Cl<sub>2</sub> (4 ml). A methanol solution (1 mL) of KF (8.7 mg, 0.15 mmol) and K<sub>2</sub>CO<sub>3</sub> (138.2 mg, 1 mmol) was then added to the solution under stirring at room temperature overnight. After removing the solvent by rotary evaporation under vacuum, the residual was re-dissolved in CH<sub>2</sub>Cl<sub>2</sub> and filtered through celite. The filtrate was concentrated under reduced pressure, which was added dropwise into 50 mL petroleum ether under vigorous stirring. A pale-yellow precipitate **1a** was finally obtained. Yield: 81% (62.1 mg). <sup>1</sup>H-NMR (400 MHz, CDCl<sub>3</sub>):  $\delta$  (ppm) 7.66-7.63 (m, 1H), 7.55-7.42 (m, 15H), 7.40-7.36 (m, 1H), 7.27-7.22 (m, 2H), 7.03 (d,  $J$  = 2.4 Hz, 2H), 6.44 (t,  $J$  = 2.4 Hz, 1H), 3.84 (s, 6H). <sup>13</sup>C-NMR (100 MHz, CDCl<sub>3</sub>):  $\delta$  (ppm) 160.05, 143.31, 138.04, 136.62, 134.57, 134.31, 131.66, 131.64, 130.17, 129.62, 129.54, 129.28, 129.24, 129.17, 128.67, 128.55, 127.10, 126.96, 123.12, 123.10, 107.53, 103.48, 103.22, 100.69 and 55.62. <sup>31</sup>P-NMR (162 MHz, CDCl<sub>3</sub>):  $\delta$  (ppm) 42.83.

### Synthesis of **1b**

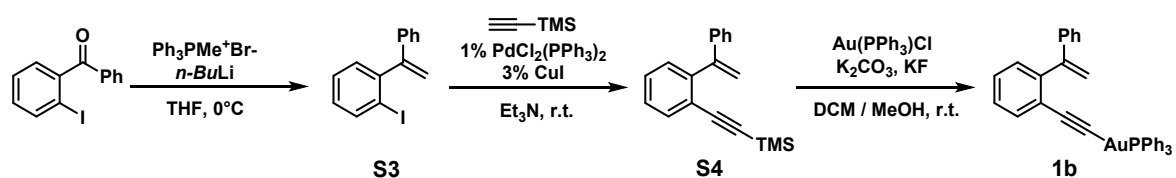

**S3** was prepared according to literature procedures.<sup>3</sup> To a stirred mixture of **S3** (306.2 mg, 1.0 mmol), PdCl<sub>2</sub>(PPh<sub>3</sub>)<sub>2</sub> (7 mg, 1 mol %) and CuI (5.7 mg, 3 mol %) in Et<sub>3</sub>N (1 mL) and THF (5 mL) at room temperature under an argon atmosphere, trimethylsilylacetylene (0.28 mL, 2.0 mmol, 2 equiv.) was added dropwise. The reaction mixture was stirred for 12 h at room temperature. The reaction mixture was filtered through Celite and the solvent was removed by rotary evaporation. The residue was treated with water and extracted with CH<sub>2</sub>Cl<sub>2</sub>. The combined organic phases were washed with brine, dried over anhydrous Na<sub>2</sub>SO<sub>4</sub> and the solvent was removed under vacuum. The residue was purified by flash column chromatography on silica gel (petroleum ether as eluent) to afford **S4**. Yield: 92% (254.3 mg). The spectra are consistent with the compound reported in the literature.<sup>4</sup> <sup>1</sup>H-NMR (400 MHz, CDCl<sub>3</sub>):  $\delta$  (ppm) 7.57-7.52 (m, 1H), 7.41-7.29 (m, 8H), 5.78 (d,  $J$  = 1.6 Hz, 1H), 5.42 (d,  $J$  = 1.6 Hz, 1H), 0.06 (s, 9H).

The synthetic procedures for **1b** is similar with that of **1a** but with **S4** (30.4 mg, 0.11 mmol) instead of **S2**. A pale-yellow precipitate was finally obtained. Yield: 85% (61.9 mg). <sup>1</sup>H-NMR (400 MHz, CDCl<sub>3</sub>): δ (ppm) 7.56-7.42 (m, 23H), 7.17-7.12 (m, 3H), 5.22 (s, 2H). <sup>13</sup>C-NMR (100 MHz, CDCl<sub>3</sub>): δ (ppm) 149.09, 144.34, 141.96, 138.06, 136.63, 134.50, 134.36, 134.00, 131.58, 131.56, 130.31, 129.76, 129.65, 129.21, 129.10, 127.99, 127.74, 127.05, 126.54, 124.43, 124.41, 116.52, 102.91 and 102.64. <sup>31</sup>P-NMR (162 MHz, CDCl<sub>3</sub>): δ (ppm) 42.84.

### Synthesis of **1c**

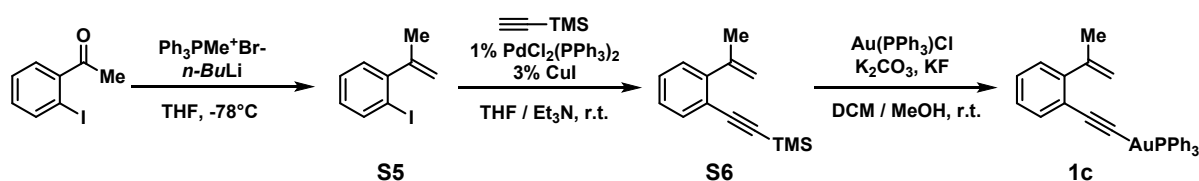

**S5**, **S6** were prepared according to literature procedures.<sup>5</sup> The synthetic procedures for **1c** is similar with that of **1a** but with **S6** (22.4 mg, 0.11 mmol) instead of **S2**. A white precipitate was collected by filtration. Yield: 83% (54.8 mg). <sup>1</sup>H-NMR (400 MHz, CDCl<sub>3</sub>): δ (ppm) 7.58-7.4 (m, 16H), 7.18-7.12 (m, 3H), 5.23 (s, 2H), 2.30 (s, 3H). <sup>13</sup>C-NMR (100 MHz, CDCl<sub>3</sub>): δ (ppm) 146.09, 146.00, 134.51, 134.37, 131.61, 131.59, 130.27, 129.71, 129.26, 129.15, 127.71, 126.75, 126.50, 122.63, 115.46, 103.29, 103.02 and 23.52. <sup>31</sup>P-NMR (162 MHz, CDCl<sub>3</sub>): δ (ppm) 42.83.

### Synthesis of **1b'**

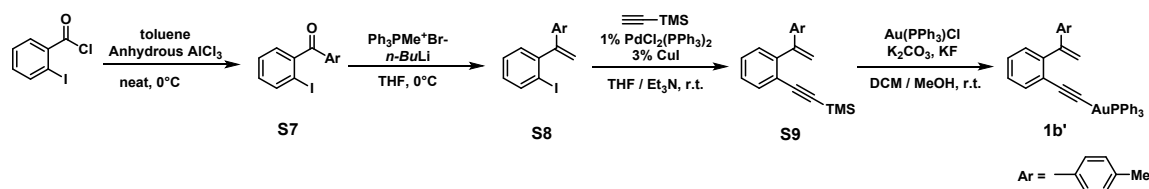

**S7**, **S8**, **S9** were prepared according to literature procedures.<sup>6-8</sup> The synthetic procedures for **1b'** is similar with that of **1a** but with **S9** (31.9 mg, 0.11 mmol) instead of **S2**. A pale yellow precipitate was finally obtained. Yield: 77% (57.3 mg). <sup>1</sup>H-NMR (400 MHz, CDCl<sub>3</sub>): δ (ppm) 7.66-7.63 (m, 1H), 7.54-7.42 (m, 16H), 7.40-7.36 (m, 1H), 7.27-7.2 (m, 1H), 7.03-7.02 (d, *J* = 8 Hz, 2H), 5.75 (d, *J* = 1.2 Hz, 1H), 5.51 (d, *J* = 1.2 Hz, 1H), 2.25 (s, 3H). <sup>13</sup>C-NMR (100 MHz, CDCl<sub>3</sub>): δ (ppm) 148.82, 144.54, 137.75, 136.62, 134.35, 134.03, 131.57, 131.54, 129.76, 129.59, 129.21, 129.16, 129.10, 128.68, 127.62, 126.93, 126.49, 124.39, 124.36, 115.71, 102.91, 102.65 and 21.27. <sup>31</sup>P-NMR (162 MHz, CDCl<sub>3</sub>): δ (ppm) 42.82.

### Synthesis of **3-3'**

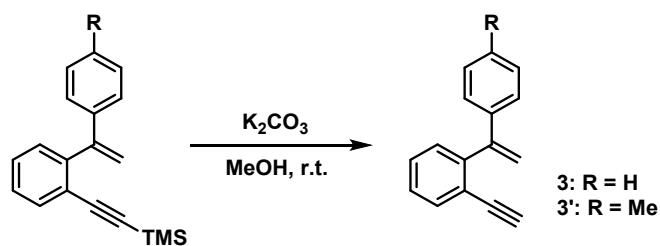

**S4/S9** (1 mmol) and  $\text{K}_2\text{CO}_3$  (691, 5 mmol) were mixed together in MeOH (10 mL). The solution was left under stirring for 2 h at room temperature. Then it was hydrolyzed with water (10 mL) and extracted with  $\text{CH}_2\text{Cl}_2$ . The combined organic phases were washed with brine, dried over anhydrous  $\text{Na}_2\text{SO}_4$  and the solvent was removed under vacuum. The residue was purified by flash column chromatography on silica gel (petroleum ether as eluent) to afford **3/3'**. Yield: 85% (173.6 mg) for **3** and 81% (176.8 mg) for **3'**. NMR data were consistent with that reported in literature.<sup>3,8</sup>

### Kinetic monitoring of the catalytic reactions.

In an NMR tube, enyne substrate **3** (3.7 mg, 0.018 mmol), clusters **2a-2d** (0.00054 mmol) and internal standard 1,3,5-trimethoxybenzene (1 mg, 0.006 mmol) were combined in  $\text{CD}_2\text{Cl}_2$  (0.5 mL) at 293K. The disappearance of **3** was monitored by the  $^1\text{H}$  NMR signal at 2.97 ppm and then the integrations of proton signals were converted into concentrations to obtain kinetic curves.

### X-ray crystallographic analysis.

Single-crystal X-ray data for **2a**, **2b**, **2c** and **2d** was collected at 100 K, 173K, 293K, 293K respectively, with Cu-K $\alpha$  radiation ( $\lambda = 1.54178 \text{ \AA}$ ) on a Rigaku Saturn 724/724+ CCD diffractometer with frames of oscillation range  $0.5^\circ$ . The selected crystal was mounted onto a nylon loop in polyisobutene and immersed in a low-temperature stream of dry nitrogen gas during data collection. All structures were solved by direct methods, and non-hydrogen atoms were located from difference Fourier maps. Non-hydrogen atoms were subjected to anisotropic refinement by full-matrix least-squares on  $F^2$  using the SHELXTL program<sup>9</sup> and Olex2 program<sup>10</sup> unless otherwise noted. The diffused electron density in the remaining void was treated by SQUEEZE program on the PLATON platform.<sup>11</sup> All figures were drawn by using Diamond program.

**Crystal data for 2a (CCDC-2286449):**  $\text{C}_{92}\text{H}_{72}\text{Au}_4\text{F}_{12}\text{N}_2\text{O}_{10}\text{P}_4\text{S}_4$ ,  $M = 2633.50$ , triclinic, space group  $P-1$  (No. 2),  $a = 15.3967(2) \text{ \AA}$ ,  $b = 23.3887(2) \text{ \AA}$ ,  $c = 27.0694(3) \text{ \AA}$ ,  $\alpha = 90.7460(10)^\circ$ ,  $\beta = 91.7370(10)^\circ$ ,  $\gamma = 91.3300(10)^\circ$ ,  $V = 9739.91(19) \text{ \AA}^3$ ,  $Z = 4$ ,  $T = 100.03(10) \text{ K}$ ,  $D_c = 1.796 \text{ g cm}^{-3}$ . The structure, refined on  $F^2$ , converged for 60249 unique reflections and 52739 observed reflections with  $I > 2\sigma(I)$  to give  $R_1 = 9.29\%$  and  $wR_2 = 25.56\%$  and a goodness-of-fit = 1.068. The SQUEEZE procedure of PLATON was used in the processing of **2a**. **2a** was refined as a two-component twin.

**Crystal data for 2b (CCDC-2286452):**  $C_{178}H_{130}Au_{11}F_{18}N_3O_{12}P_6S_6$ ,  $M = 5389.65$ , monoclinic, space group  $C2/c$  (No. 15),  $a = 29.4994(3) \text{ \AA}$ ,  $b = 19.4956(2) \text{ \AA}$ ,  $c = 33.2461(3) \text{ \AA}$ ,  $\alpha = 90^\circ$ ,  $\beta = 100.7470(10)^\circ$ ,  $\gamma = 90^\circ$ ,  $V = 18784.7(3) \text{ \AA}^3$ ,  $Z = 4$ ,  $T = 173(2) \text{ K}$ ,  $D_c = 1.906 \text{ g cm}^{-3}$ . The structure, refined on  $F^2$ , converged for 19076 unique reflections ( $R_{\text{int}} = 0.0414$ ) and 17707 observed reflections with  $I > 2\sigma(I)$  to give  $R_1 = 3.42\%$  and  $wR_2 = 8.85\%$  and a goodness-of-fit = 1.028. The SQUEEZE procedure of PLATON was used in the processing of **2b**.

**Crystal data for 2c (CCDC-2286453):**  $C_{284}H_{216}Au_{28}F_{24}N_4O_{16}P_8S_8$ ,  $M = 10416.16$ , orthorhombic, space group  $C2/c$  (No. 15),  $a = 47.3293(7) \text{ \AA}$ ,  $b = 20.0353(5) \text{ \AA}$ ,  $c = 41.2327(6) \text{ \AA}$ ,  $\alpha = 90^\circ$ ,  $\beta = 114.081(2)^\circ$ ,  $\gamma = 90^\circ$ ,  $V = 35696.4(13) \text{ \AA}^3$ ,  $Z = 4$ ,  $T = 293(2) \text{ K}$ ,  $D_c = 1.730 \text{ g cm}^{-3}$ . The structure, refined on  $F^2$ , converged for 36215 unique reflections ( $R_{\text{int}} = 0.0526$ ) and 25596 observed reflections with  $I > 2\sigma(I)$  to give  $R_1 = 5.91\%$  and  $wR_2 = 18.09\%$  and a goodness-of-fit = 1.060. Four counterions were highly disordered and could not be reasonably located. The SQUEEZE procedure of PLATON was used in the processing of **2c**.

**Crystal data for 2d (CCDC-2286454):**  $C_{190}H_{135}Au_{14}F_{12}N_2O_8P_5S_4$ ,  $M = 5842.61$ , triclinic, space group  $P-1$  (No. 2),  $a = 16.0520(4) \text{ \AA}$ ,  $b = 18.4672(5) \text{ \AA}$ ,  $c = 33.1755(8) \text{ \AA}$ ,  $\alpha = 84.197(2)^\circ$ ,  $\beta = 78.827(2)^\circ$ ,  $\gamma = 76.291(2)^\circ$ ,  $V = 9357.4(4) \text{ \AA}^3$ ,  $Z = 2$ ,  $T = 293(2) \text{ K}$ ,  $D_c = 2.074 \text{ g cm}^{-3}$ . The structure, refined on  $F^2$ , converged for 31332 unique reflections ( $R_{\text{int}} = 0.0881$ ) and 23694 observed reflections with  $I > 2\sigma(I)$  to give  $R_1 = 6.58\%$  and  $wR_2 = 18.39\%$  and a goodness-of-fit = 1.031. The SQUEEZE procedure of PLATON was used in the processing of **2d**. There is one A alert of "Check Calcd Resid. Dens. 1.10Ang From Au0A" can be ascribed to the Fourier truncation error induced by the metal atom.

## Supplementary Figures

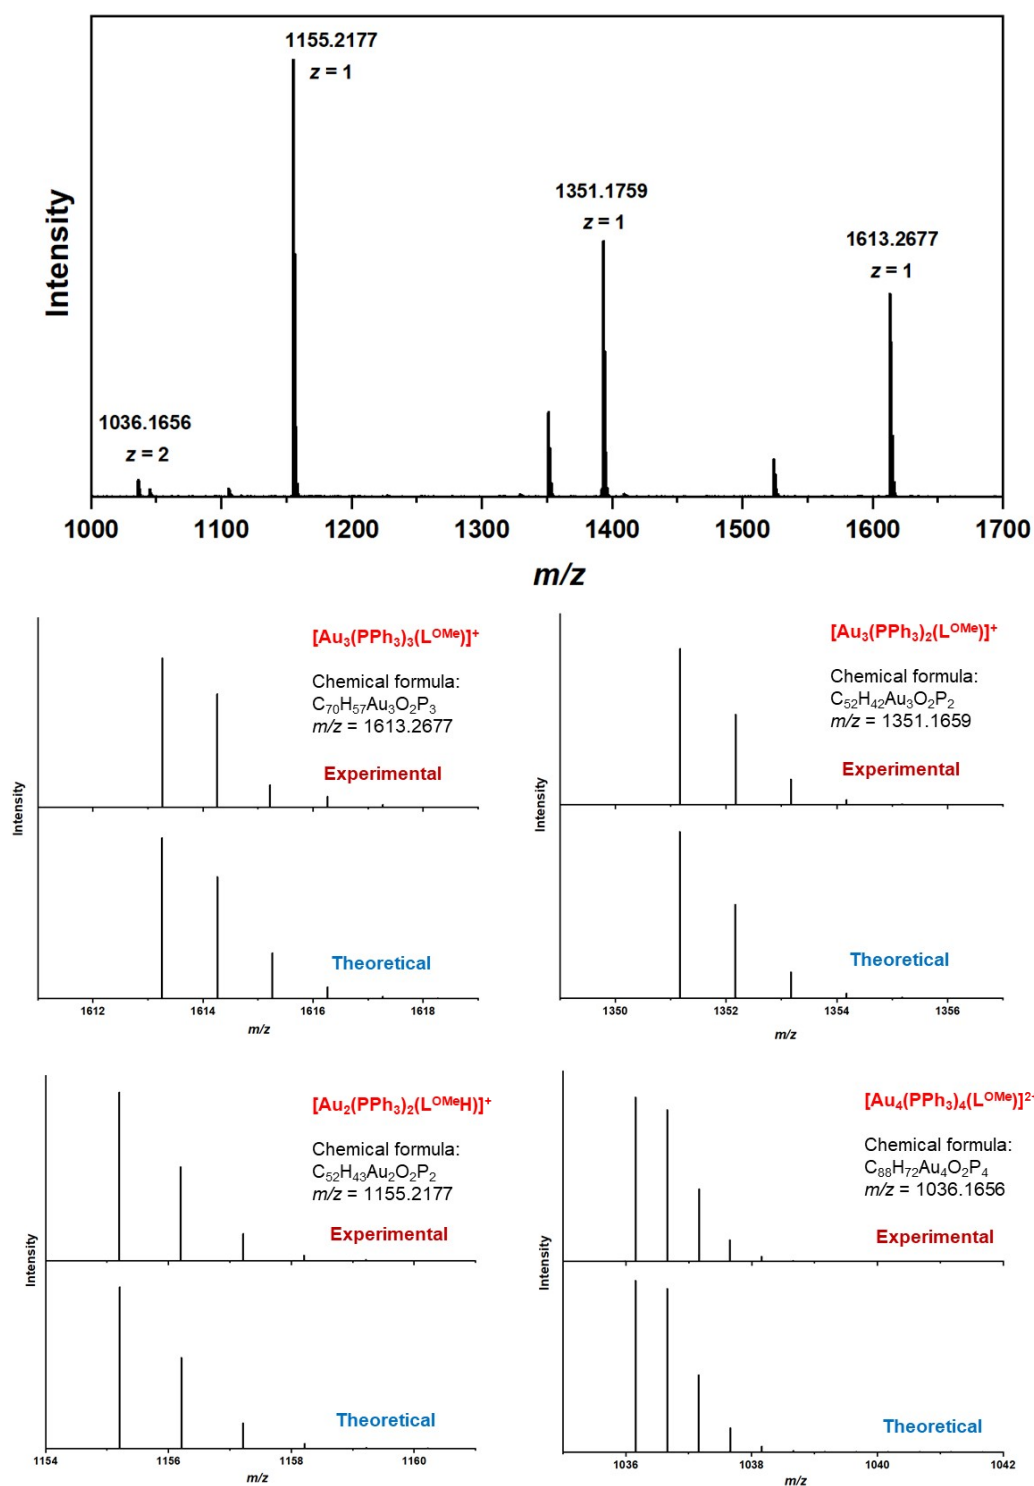

**Fig. S1** The *in situ* electrospray ionization mass spectroscopy (ESI-MS) spectra of the reaction between **1a** and one equivalent  $\text{Au}(\text{PPh}_3)(\text{NTf}_2)$  in 1,2-dichloroethane.

Calcd. for  $\text{C}_{70}\text{H}_{57}\text{Au}_3\text{O}_2\text{P}_3$  1613.2568 ( $[\text{Au}_3(\text{PPh}_3)_3(\text{L}^{\text{OMe}})]^+$ ), found 1613.2677;

Calcd. for  $\text{C}_{52}\text{H}_{42}\text{Au}_3\text{O}_2\text{P}_2$  1351.1657 ( $[\text{Au}_3(\text{PPh}_3)_2(\text{L}^{\text{OMe}})]^+$ ), found 1351.1759;

Calcd. for  $\text{C}_{52}\text{H}_{43}\text{Au}_2\text{O}_2\text{P}_2$  1155.2064 ( $[\text{Au}_2(\text{PPh}_3)_2(\text{L}^{\text{OMeH}})]^+$ ), found 1155.2177;

Calcd. for  $\text{C}_{88}\text{H}_{72}\text{Au}_4\text{O}_2\text{P}_4$  1036.1567 ( $[\text{Au}_4(\text{PPh}_3)_4(\text{L}^{\text{OMe}})]^{2+}$ ), found 1036.1656.

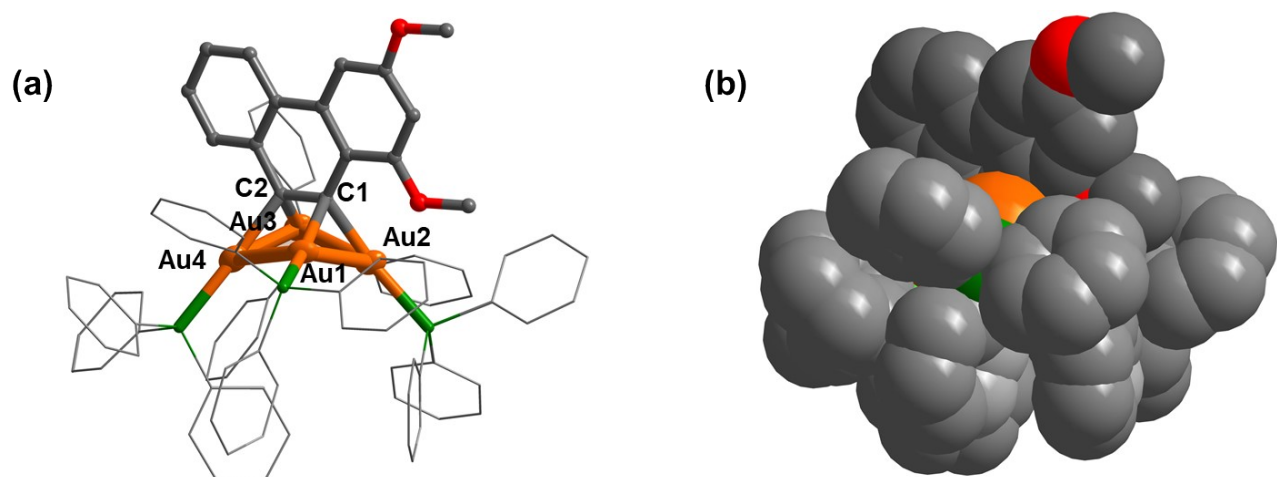

**Fig. S2** (a) Crystal structure of complex **2a**. Hydrogen atoms, peripheral  $\text{NTf}_2^-$  counterions are omitted for clarity. Color coding: Au, orange; C, gray; P, green. Selected bond lengths ( $\text{\AA}$ ): Au1-Au2 2.7825(8); Au1-Au4 3.0472(8); Au2-Au3 2.9791(7); Au3-Au4 2.7859(8); Au1-C1 2.214(12); Au2-C1 2.125(14); Au3-C2 2.177(13); Au4-C2 2.108(14). (b) Space-filling model of **2a**.

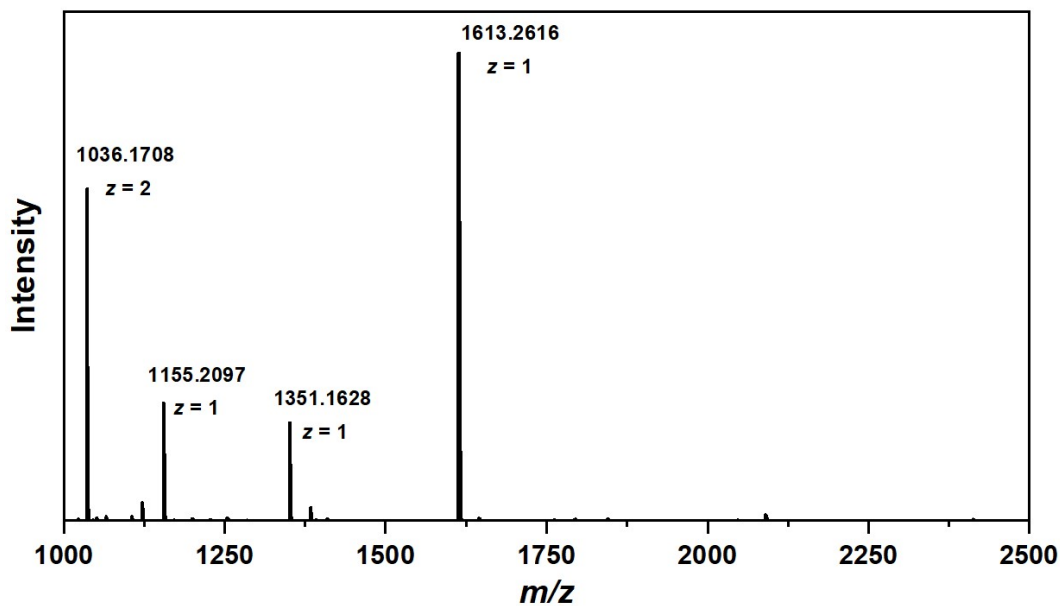

**Fig. S3** High resolution ESI-MS spectra of complex **2a** in 1,2-dichloroethane. Calcd. for  $\text{C}_{88}\text{H}_{72}\text{Au}_4\text{O}_2\text{P}_4$  1036.1567 ( $[\text{Au}_4(\text{PPh}_3)_4(\text{L}^{\text{OMe}})]^{2+}$ ), found 1036.1708.

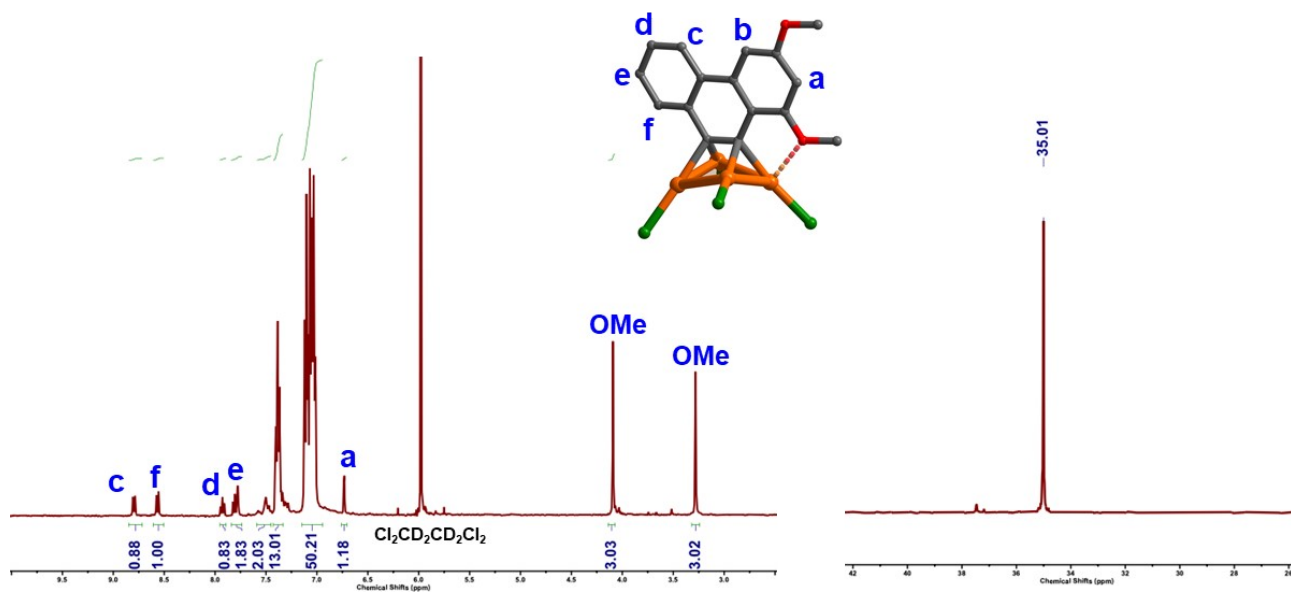

**Fig. S4**  $^1\text{H}$  and  $^{31}\text{P}$  NMR spectra of complex **2a** in  $\text{Cl}_2\text{CD}_2\text{CD}_2\text{Cl}_2$ . Only one peak in  $^{31}\text{P}$  NMR spectrum illustrates that there is rapid exchange of  $[\text{Au}(\text{PPh}_3)]^+$  units in solution.

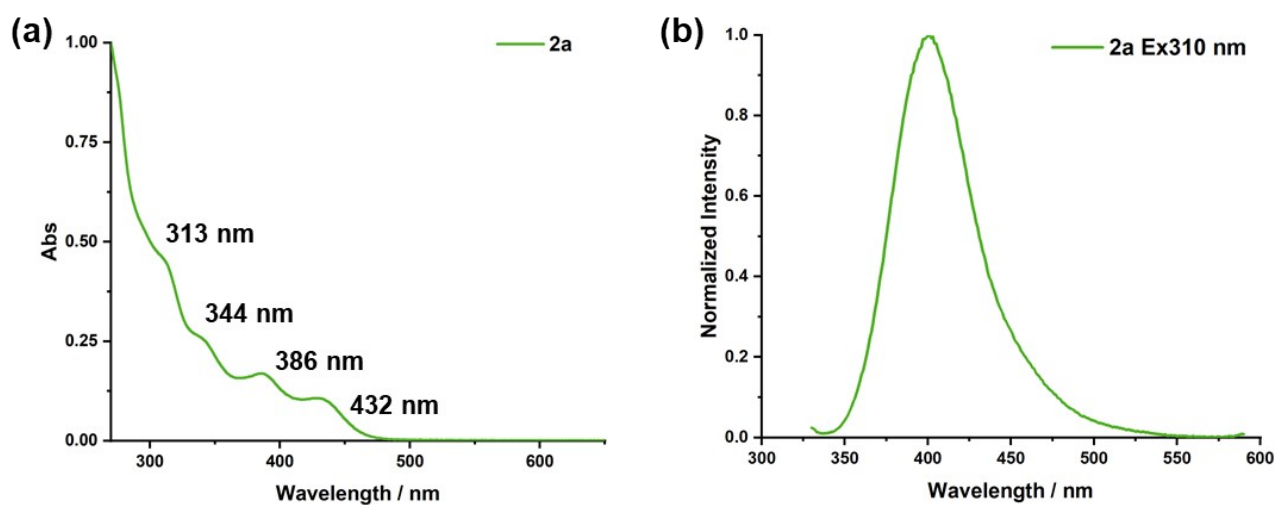

**Fig. S5** UV-vis (a) and emission (b) spectra of complex **2a** in 1,2-dichloroethane.



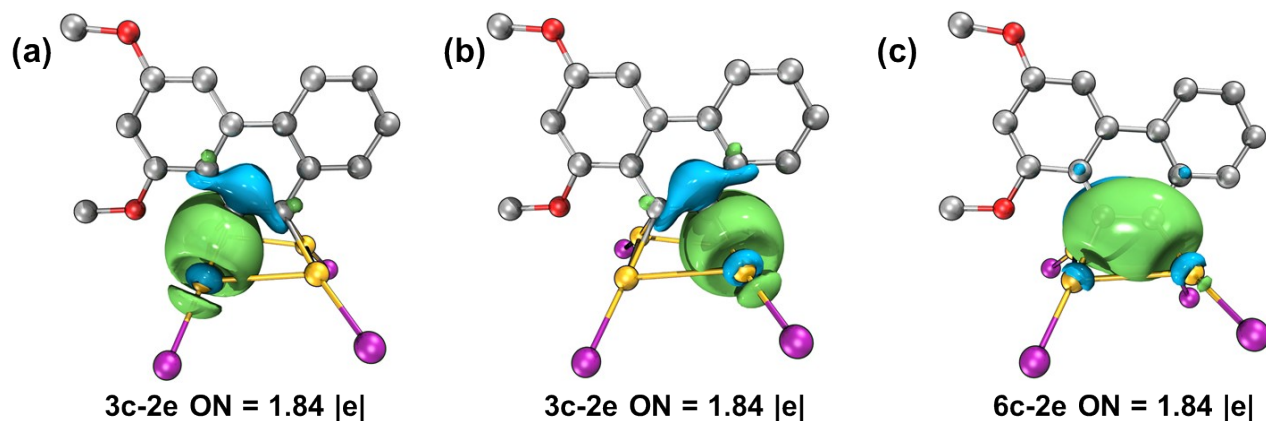

**Fig. S6** AdNDP analysis of **2a** (isovalue: 0.03). Therein, the  $\text{PPh}_3$  ligands were simplified as  $\text{PH}_3$  and the effect of proton on the organic skeleton was neglected. The two degenerate  $3c-2e$  bonds mainly comprise  $2s$ ,  $2p$  orbitals of central dicarbon (19.2 and 57.3%, respectively) and  $6s$  orbitals of digold (8.8 and 10.8%, respectively). The  $6c-2e$  bonds mainly comprise  $2p$  orbitals of central dicarbon (46.5 and 43.1%, respectively) and  $6s$  orbitals of four gold atoms (about 2.0% each).

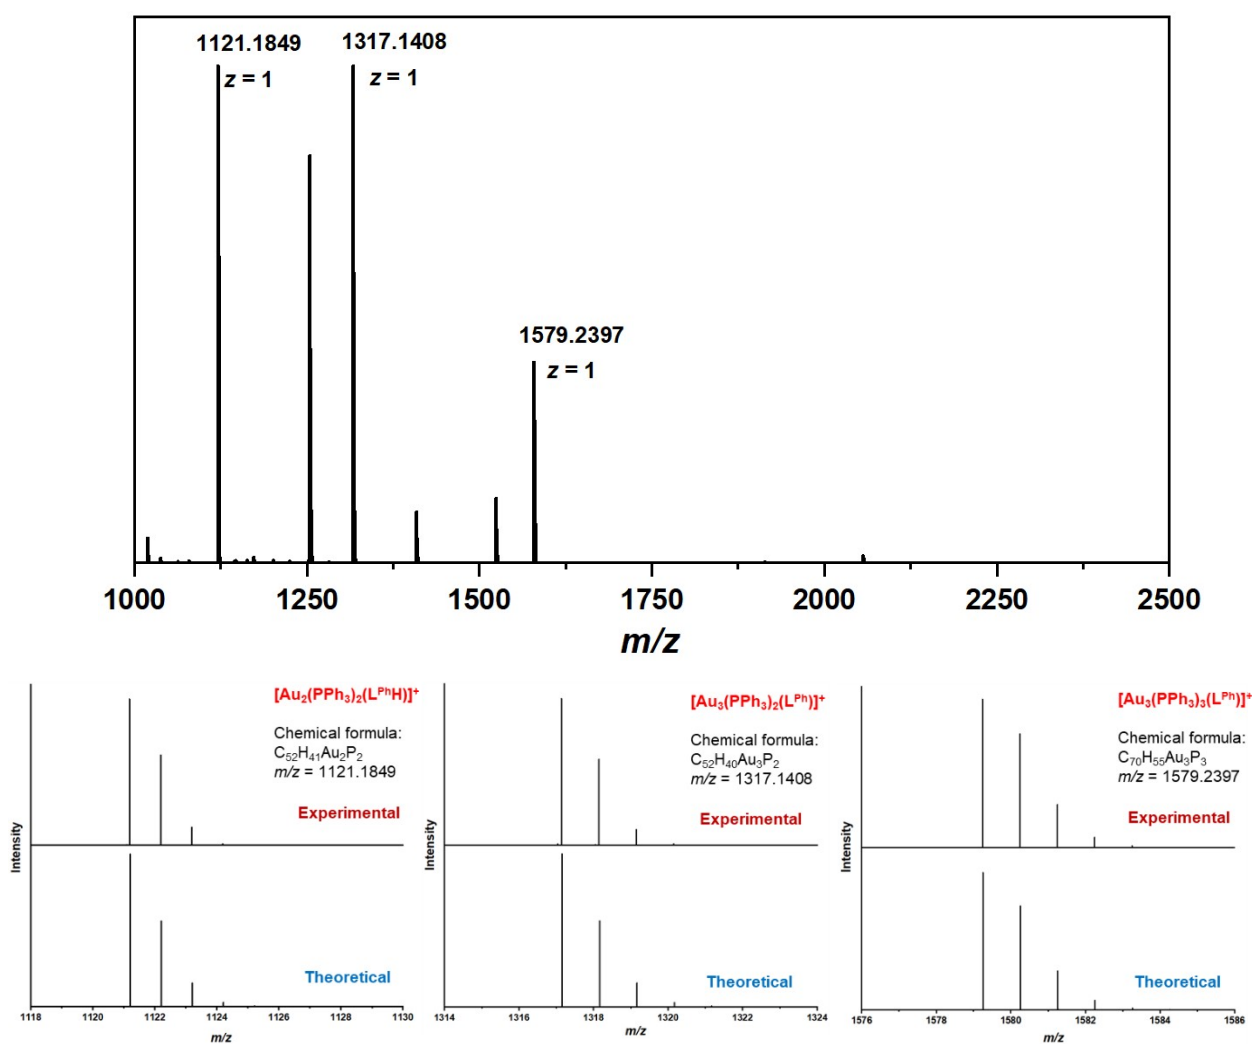

**Fig. S7** The *in situ* ESI-MS spectra of the reaction between **1b** and three equivalents  $\text{Au}(\text{PPh}_3)(\text{NTf}_2)$  in 1,2-dichloroethane.

Calcd. for  $\text{C}_{52}\text{H}_{41}\text{Au}_2\text{P}_2$  1121.2009 ( $[\text{Au}_2(\text{PPh}_3)_2(\text{L}^{\text{PhH}})]^+$ ), found 1121.1849;

Calcd. for  $\text{C}_{52}\text{H}_{40}\text{Au}_3\text{P}_2$  1317.1596 ( $[\text{Au}_3(\text{PPh}_3)_2(\text{L}^{\text{Ph}})]^+$ ), found 1317.1408;

Calcd. for  $\text{C}_{70}\text{H}_{55}\text{Au}_3\text{P}_3$  1579.2513 ( $[\text{Au}_3(\text{PPh}_3)_3(\text{L}^{\text{Ph}})]^+$ ), found 1579.2397.

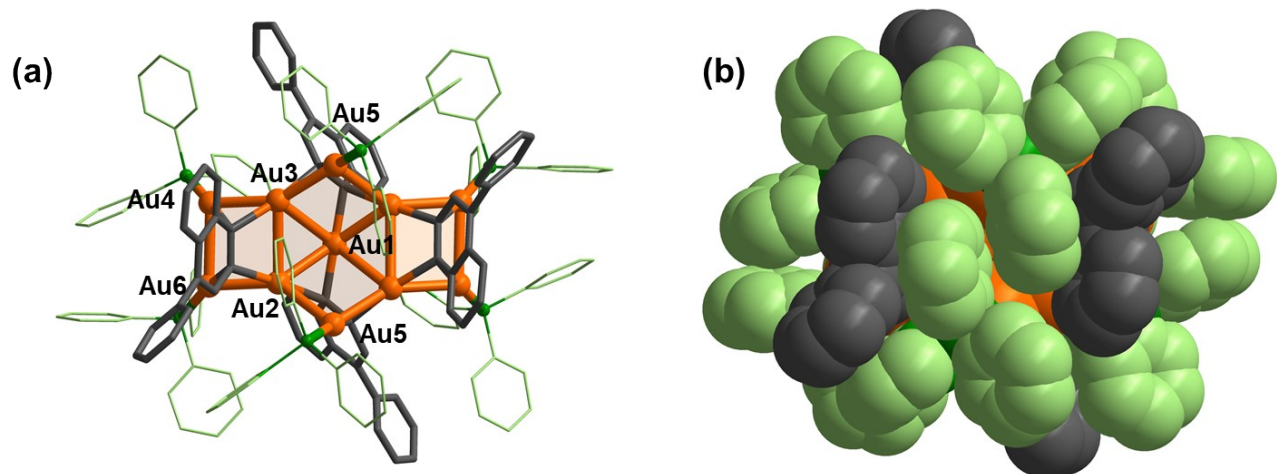

**Fig. S8** (a) Crystal structure of complex **2b**. Hydrogen atoms, peripheral  $\text{NTf}_2^-$  counterions are omitted for clarity. Color coding: Au, orange; C, gray;  $\text{PPh}_3$ , green. Selected bond lengths ( $\text{\AA}$ ): Au1-Au2 2.7006(2); Au1-Au3 3.0766(2); Au2-Au3 3.0880(3); Au2-Au5 3.0413(3); Au2-Au6 2.7033(3); Au3-Au4 2.7141(3); Au3-Au5 2.7385(3); Au4-Au6 3.0719(3). (b) Space-filling model of **2b**.

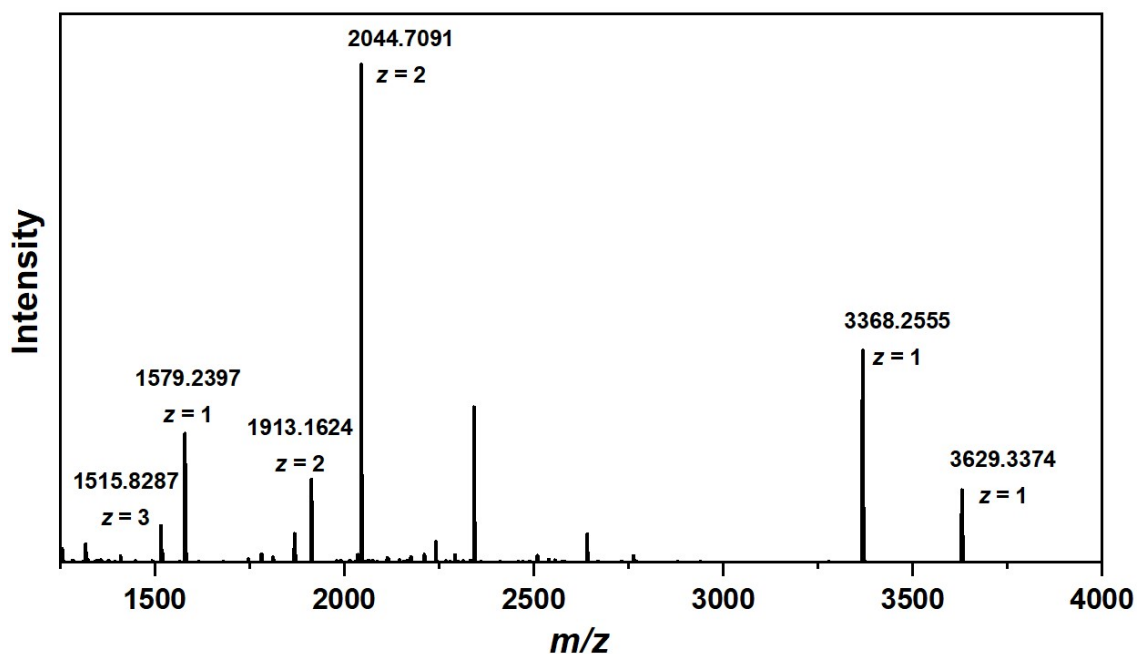

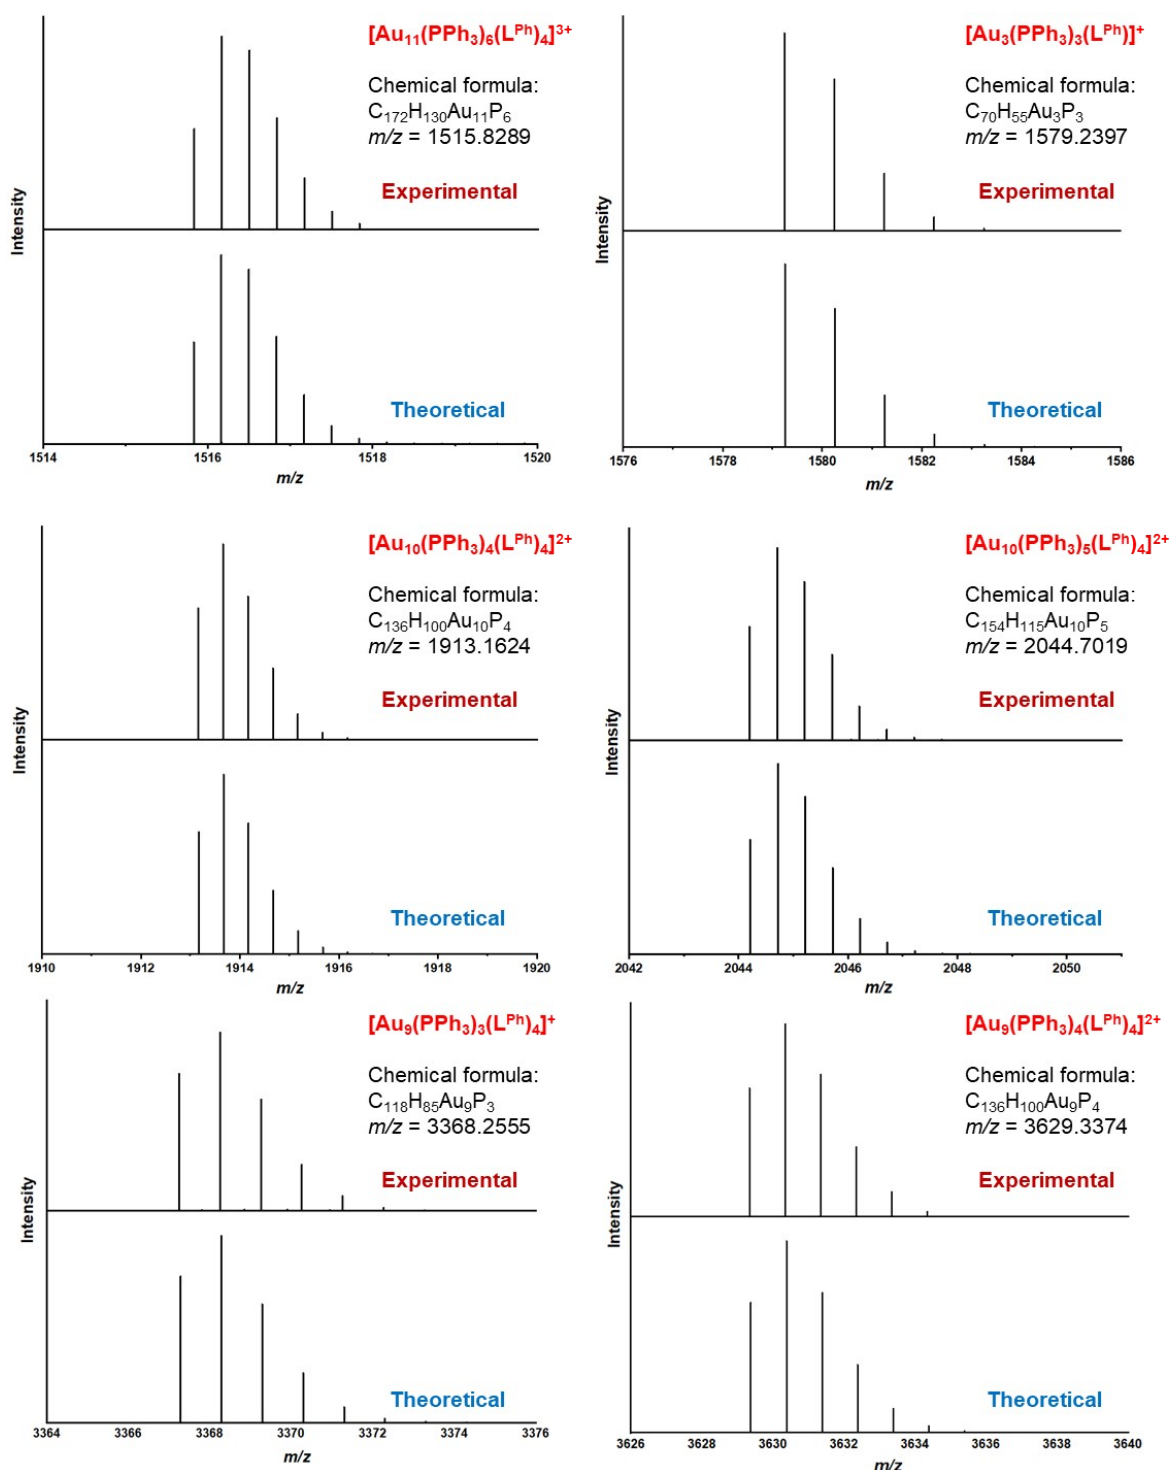

**Fig. S9** High resolution ESI-MS spectra of complex **2b** in 1,2-dichloroethane.  
 Calcd. for  $C_{172}H_{130}Au_{11}P_6$  1515.8306 ( $[Au_{11}(PPh_3)_6(L^{Ph})_4]^{3+}$ ), found 1515.8289;  
 Calcd. for  $C_{70}H_{55}Au_3P_3$  1579.2513 ( $[Au_3(PPh_3)_3(L^{Ph})]^+$ ), found 1579.2397;  
 Calcd. for  $C_{136}H_{100}Au_{10}P_4$  1913.1710 ( $[Au_{10}(PPh_3)_4(L^{Ph})_4]^{2+}$ ), found 1913.1624;  
 Calcd. for  $C_{154}H_{115}Au_{10}P_5$  2044.2166 ( $[Au_{10}(PPh_3)_5(L^{Ph})_4]^{2+}$ ), found 2044.7019;  
 Calcd. for  $C_{118}H_{85}Au_9P_3$  3368.2932 ( $[Au_9(PPh_3)_3(L^{Ph})_4]^+$ ), found 3368.2555;  
 Calcd. for  $C_{136}H_{100}Au_9P_4$  3629.3765 ( $[Au_9(PPh_3)_4(L^{Me})_4]^+$ ), found 3629.3374.

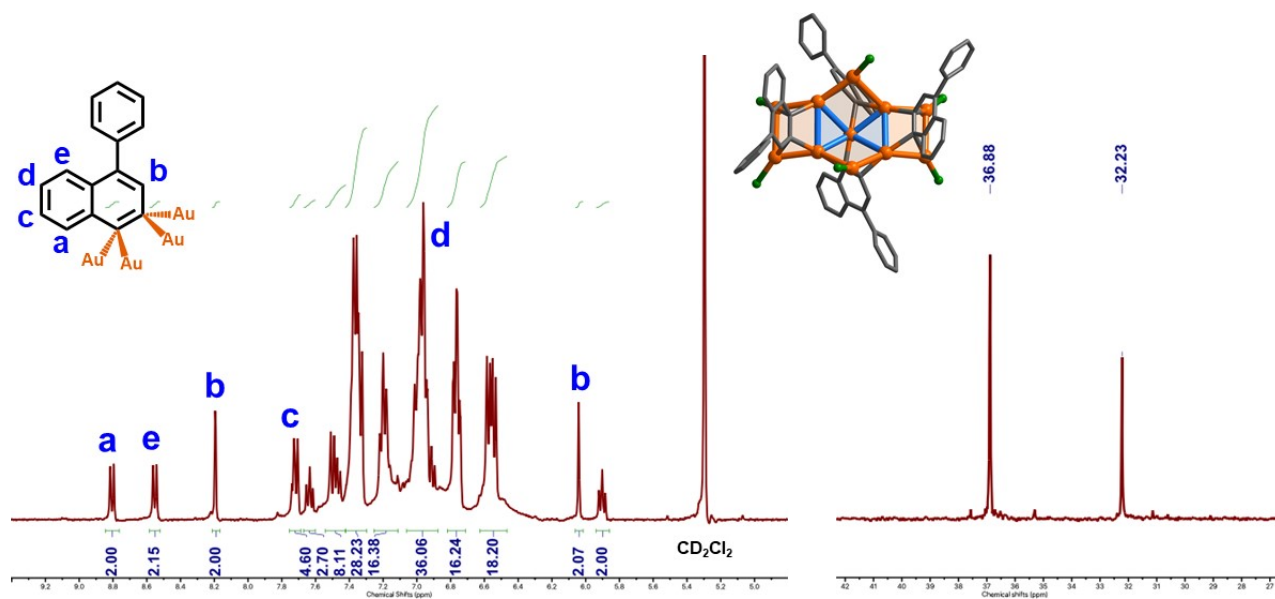

Fig. S10  $^1\text{H}$  and  $^{31}\text{P}$  NMR spectra of complex **2b** in  $\text{CD}_2\text{Cl}_2$ .

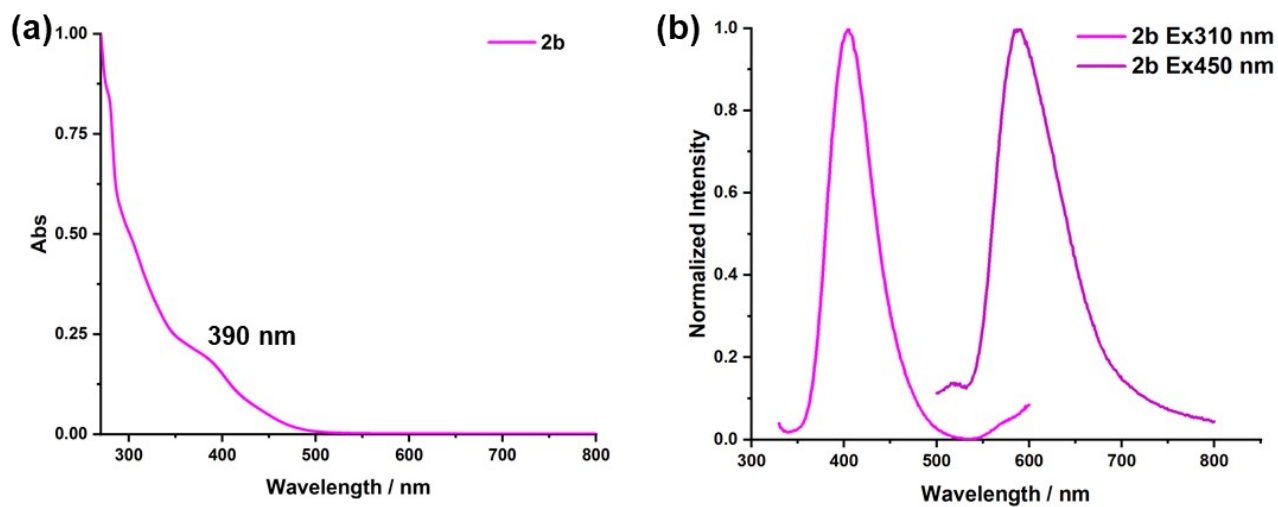

Fig. S11 UV-vis (a) and emission (b) spectra of complex **2b** in 1,2-dichloroethane.

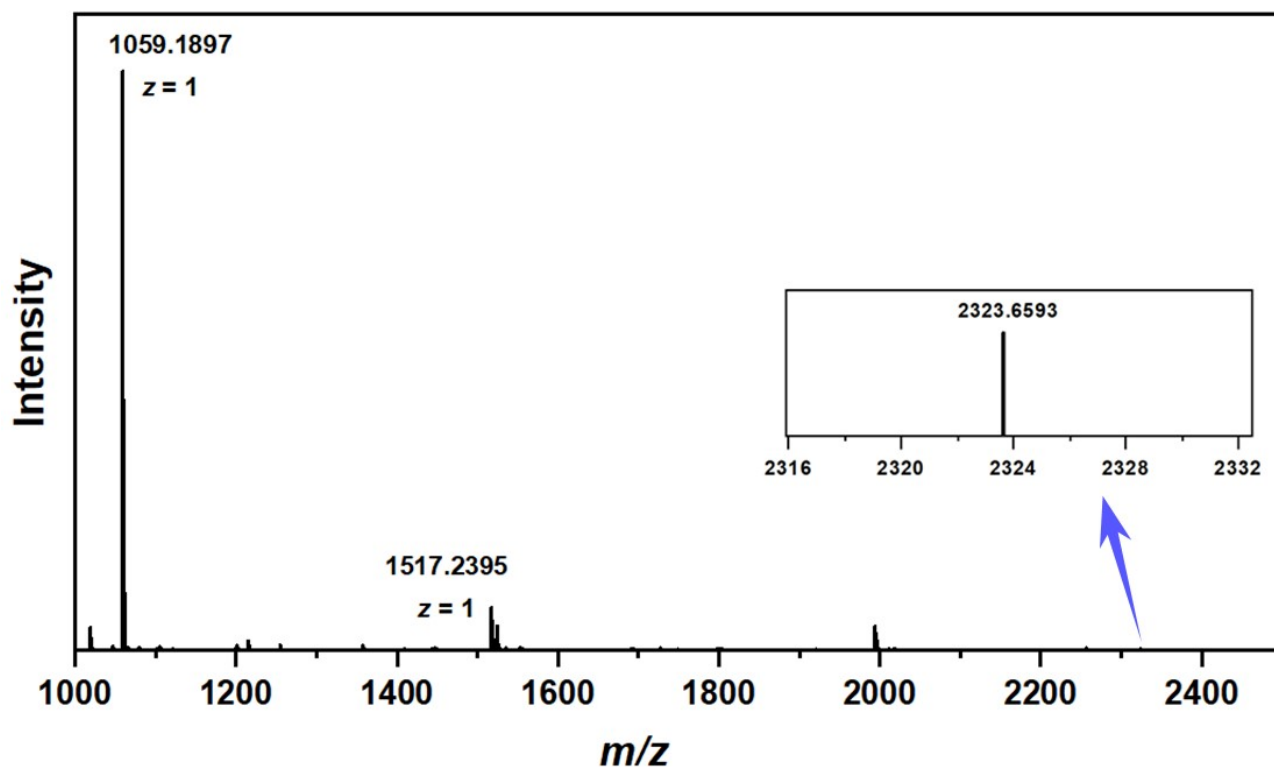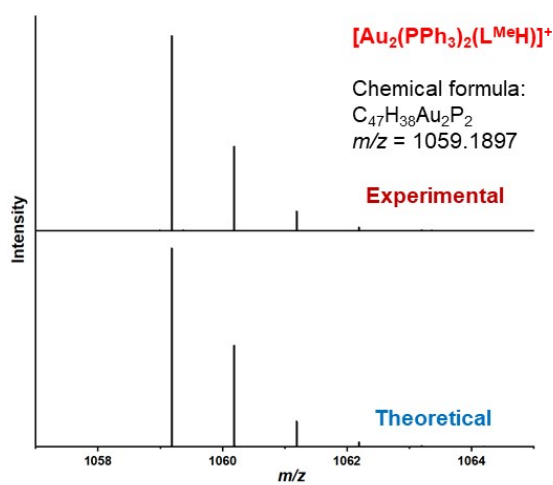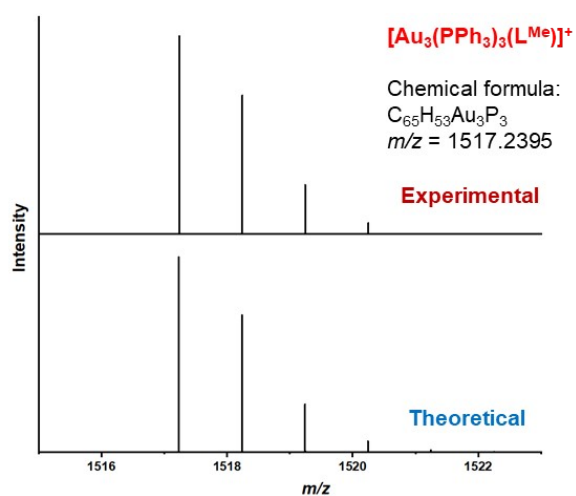

**Fig. S12** High resolution ESI-MS spectra of the reaction between **1c** and three equivalents Au(PPh<sub>3</sub>)(NTf<sub>2</sub>) in 1,2-dichloroethane.

Calcd. for C<sub>47</sub>H<sub>38</sub>Au<sub>2</sub>P<sub>2</sub> 1059.1853 ([Au<sub>2</sub>(PPh<sub>3</sub>)<sub>2</sub>(L<sup>Me</sup>H)]<sup>+</sup>), found 1059.1897;

Calcd. for C<sub>65</sub>H<sub>53</sub>Au<sub>3</sub>P<sub>3</sub> 1517.2351 ([Au<sub>3</sub>(PPh<sub>3</sub>)<sub>3</sub>(L<sup>Me</sup>)]<sup>+</sup>), found 1517.2395.

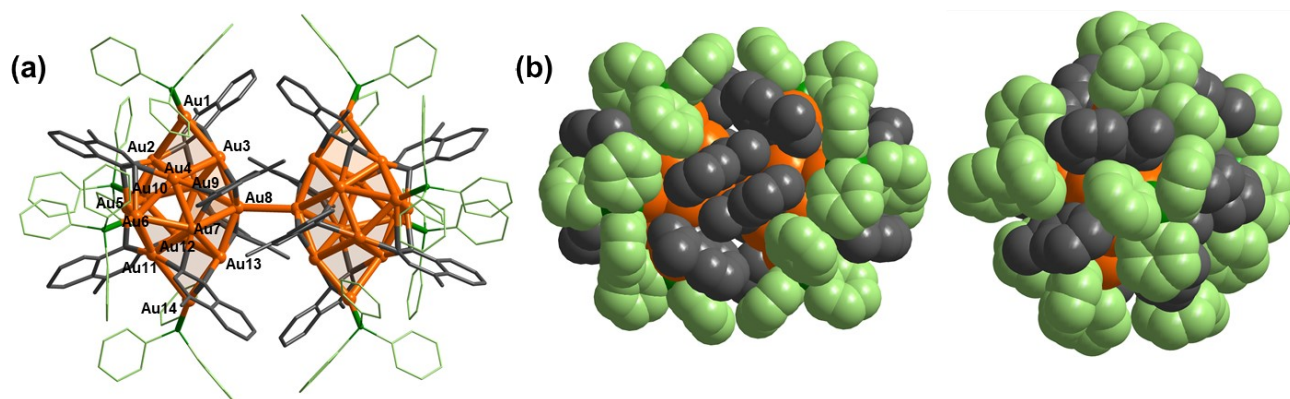

**Fig. S13** (a) Crystal structure of complex **2c**. Hydrogen atoms, peripheral  $\text{NTf}_2^-$  counterions are omitted for clarity. Color coding: Au, orange; C, gray;  $\text{PPh}_3$ , green. Selected bond lengths ( $\text{\AA}$ ): Au1-Au2 3.1930(8); Au1-Au3 2.7002(6); Au1-Au4 3.546; Au2-Au3 3.518; Au2-Au4 3.2087(9); Au2-Au5 2.8046(7); Au2-Au10 2.8913(9); Au3-Au4 3.0682(7); Au3-Au8 2.6841(6); Au3-Au9 2.9897(8); Au4-Au6 2.7410(7); Au4-Au7 2.7269(6); Au5-Au10 2.8828(11); Au5-Au6 2.9011(11); Au5-Au11 2.7989(7); Au6-Au7 2.9308(7); Au6-Au11 2.8861(9); Au7-Au8 3.1686(7); Au7-Au13 3.0030(7); Au8-Au9 3.1638(7); Au8-Au13 2.6774(6); Au9-Au10 2.9945(7); Au9-Au12 2.7120(6); Au10-Au12 2.7464(7); Au11-Au12 3.2249(9); Au11-Au13 3.505; Au11-Au14 3.1106(7); Au12-Au13 3.0934(7); Au12-Au14 3.490; Au13-Au14 2.6900(6). (b) Space-filling model of **2c**, indicating the  $\pi$ - $\pi$  stacking of methylanthalene and the steric hindrance of the peripheral ligand is responsible for the loss of one-fold C-Au bond.

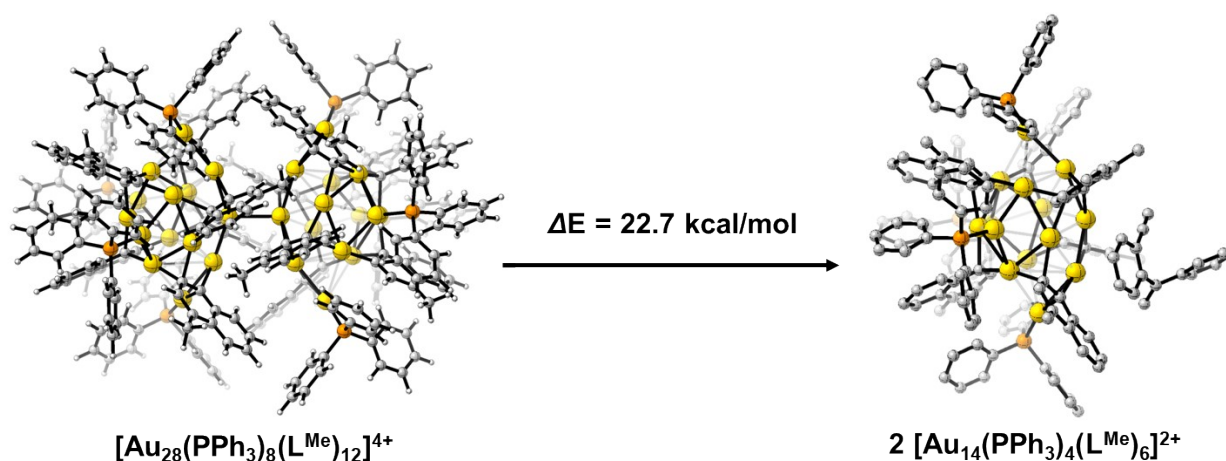

**Fig. S14** DFT calculation for the energy of the dissociation of  $\text{Au}_{28}$  to  $^{\text{Me}}\text{Au}_{14}$ . This can be seen as the energy of breaking one Au-Au bond and two-fold  $\pi$ - $\pi$  stacking interaction.



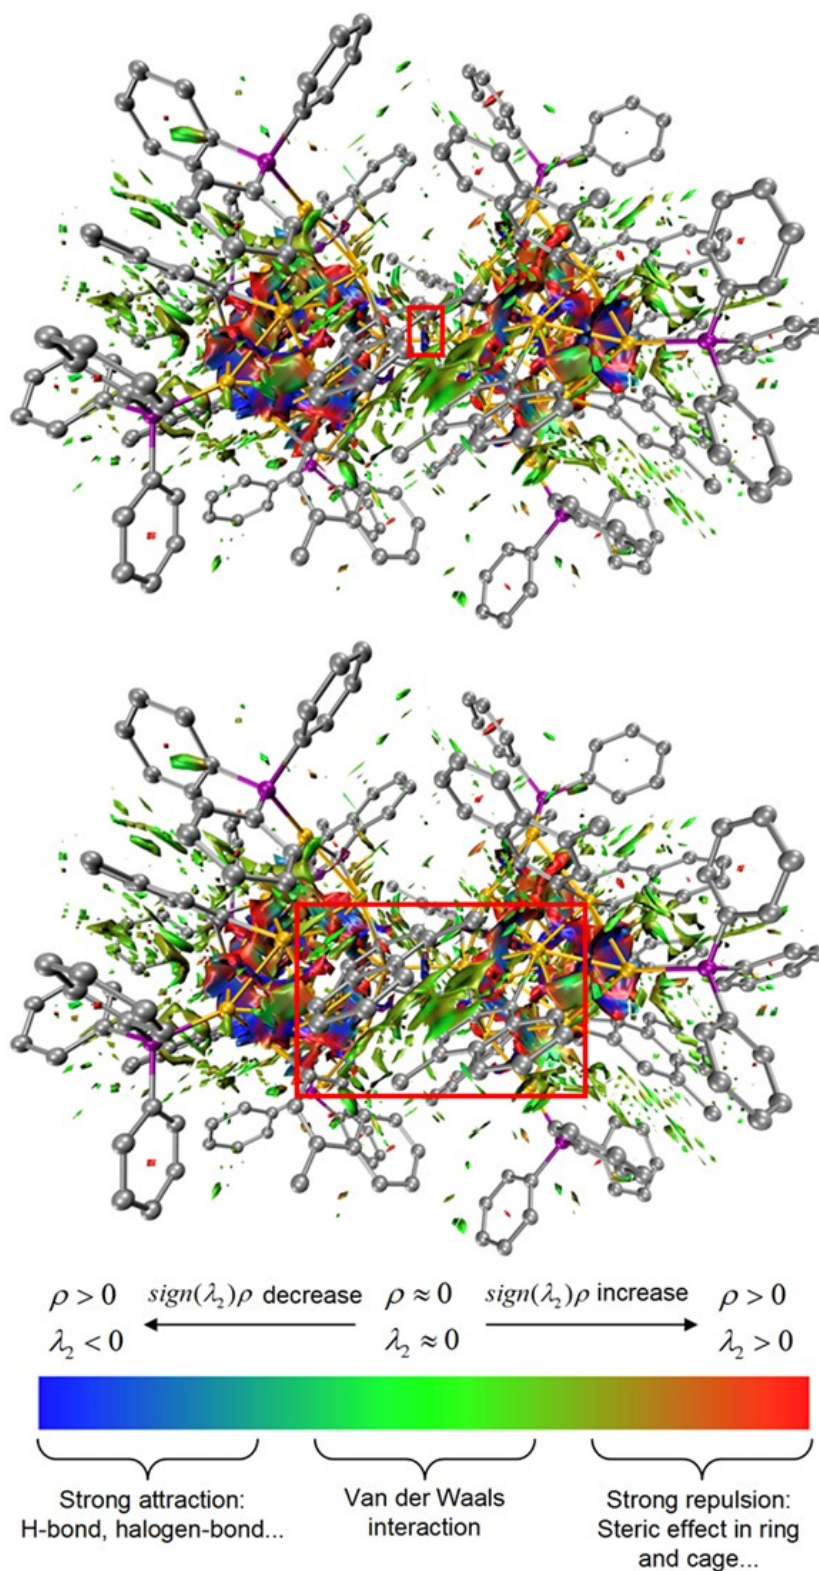

**Fig. S15** Noncovalent interaction (NCI) map of **2c**. Isosurfaces of  $RDG = 0.5$  are colored by  $sign(\lambda_2)\rho$  according to the color bar.<sup>12</sup>



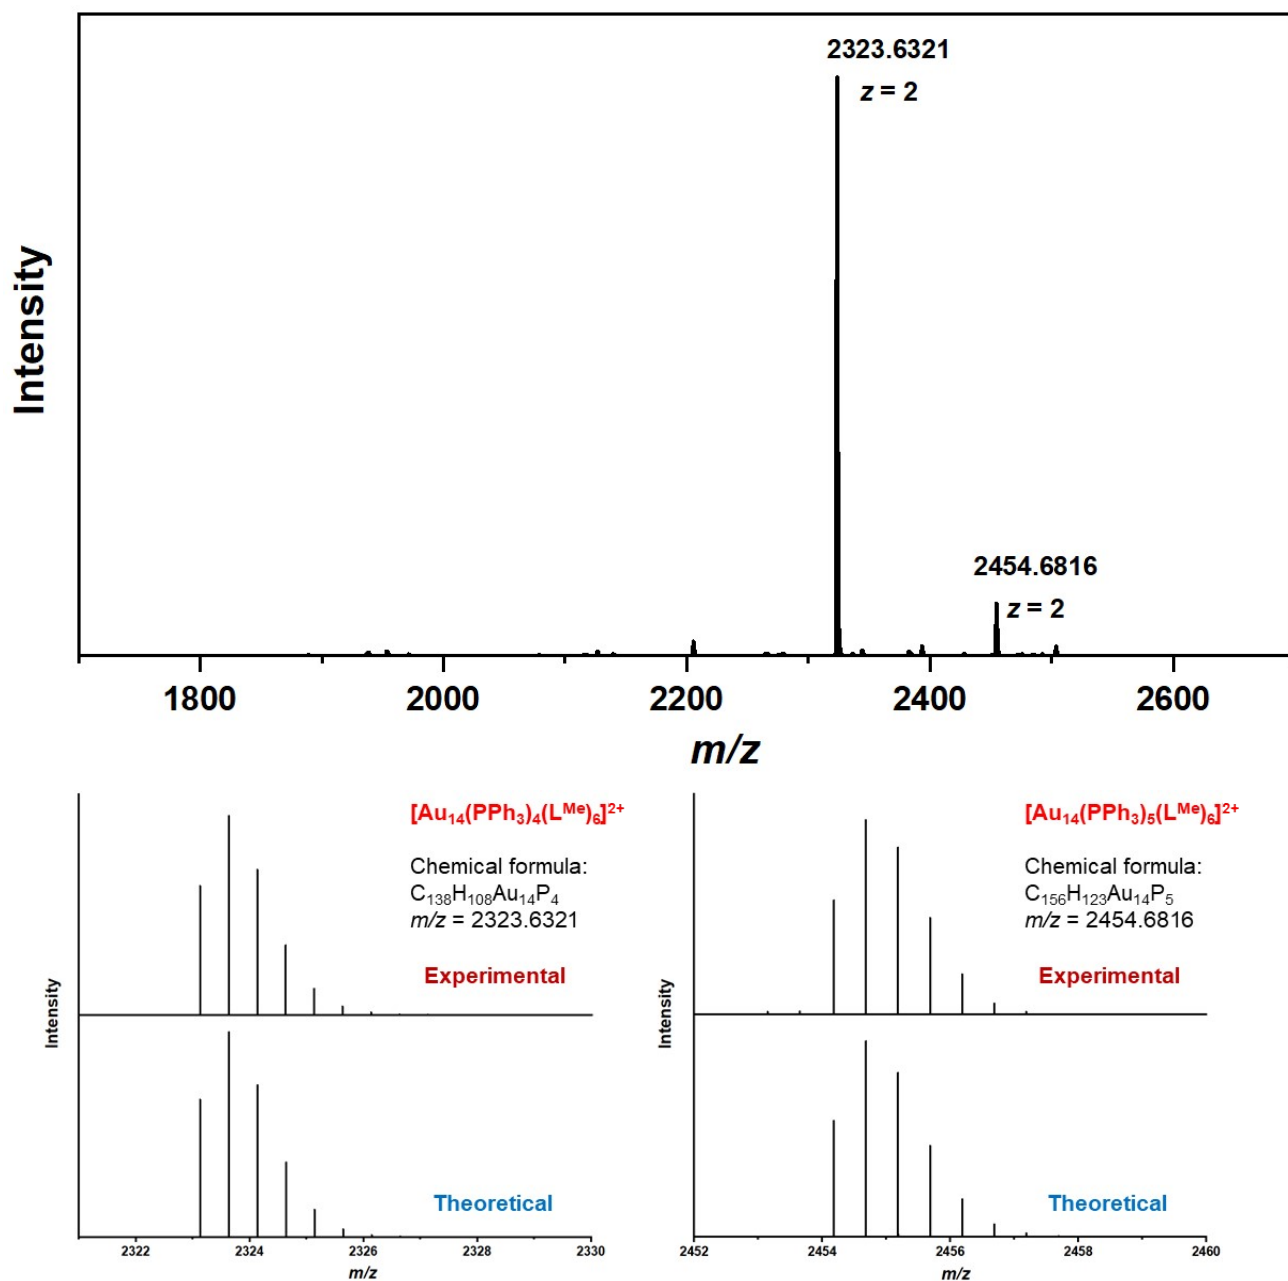

**Fig. S16** High resolution ESI-MS spectra of complex **2c** in 1,2-dichloroethane.  
 Calcd. for  $\text{C}_{138}\text{H}_{108}\text{Au}_{14}\text{P}_4$  2323.1360 ( $[\text{Au}_{14}(\text{PPh}_3)_4(\text{L}^{\text{Me}})_6]^{2+}$ ), found 2323.6321;  
 Calcd. for  $\text{C}_{156}\text{H}_{123}\text{Au}_{14}\text{P}_5$  2454.1815 ( $[\text{Au}_{14}(\text{PPh}_3)_5(\text{L}^{\text{Me}})_6]^{2+}$ ), found 2454.6816.

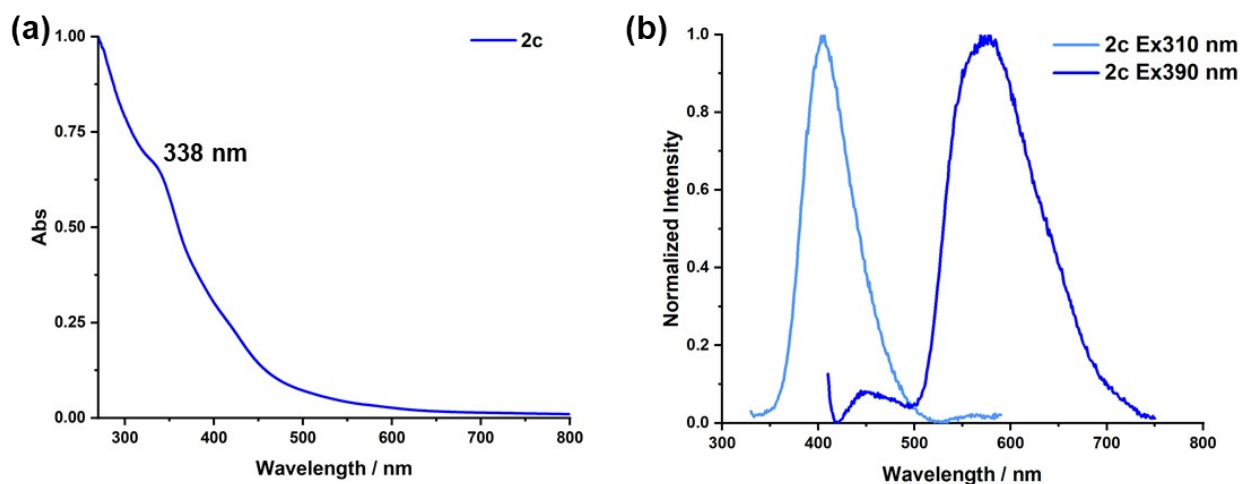

**Fig. S17** UV-vis (a) and emission (b) spectra of complex **2c** in 1,2-dichloroethane.

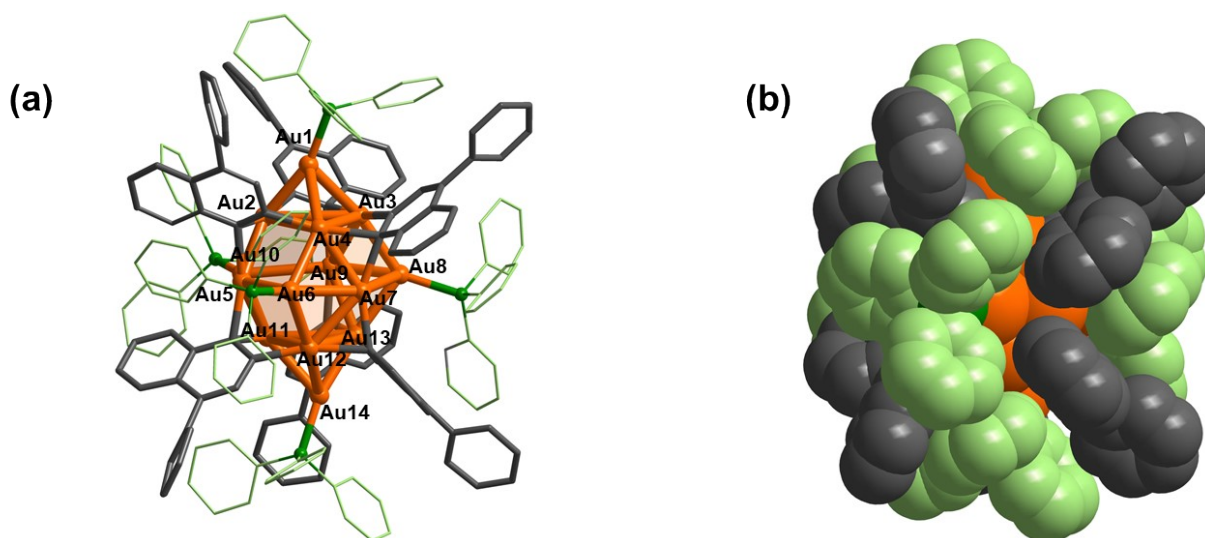

**Fig. S18** (a) Crystal structure of complex **2d**. Hydrogen atoms, peripheral  $\text{NTf}_2^-$  counterions are omitted for clarity. Color coding: Au, orange; C, gray; P, green. Selected bond lengths ( $\text{\AA}$ ): Au1-Au2 2.6129(9); Au1-Au3 2.8055(11); Au1-Au4 2.9070(11); Au2-Au3 3.0413(3); Au2-Au4 2.7033(3); Au2-Au5 2.7141(3); Au2-Au10 2.7385(3); Au3-Au4 3.4271(9); Au3-Au8 2.5956(17); Au3-Au9 2.7469(7); Au4-Au6 2.7397(9); Au4-Au7 2.7234(8); Au5-Au10 2.8255(8); Au5-Au6 3.1463(9); Au5-Au11 2.8424(8); Au6-Au7 2.9653(10); Au6-Au12 2.7019(9); Au7-Au8 3.245(2); Au7-Au12 2.7832(8); Au8-Au9 2.867(5); Au8-Au13 2.696(3); Au9-Au10 3.2172(10); Au9-Au13 2.8777(8); Au10-Au11 2.6538(8); Au11-Au12 3.2067(8); Au11-Au13 3.1859(9); Au11-Au14 2.8636(9); Au12-Au13 3.4410(8); Au12-Au14 2.8529(9); Au13-Au14 2.6412(8). (b) Space-filling model of **2d**.

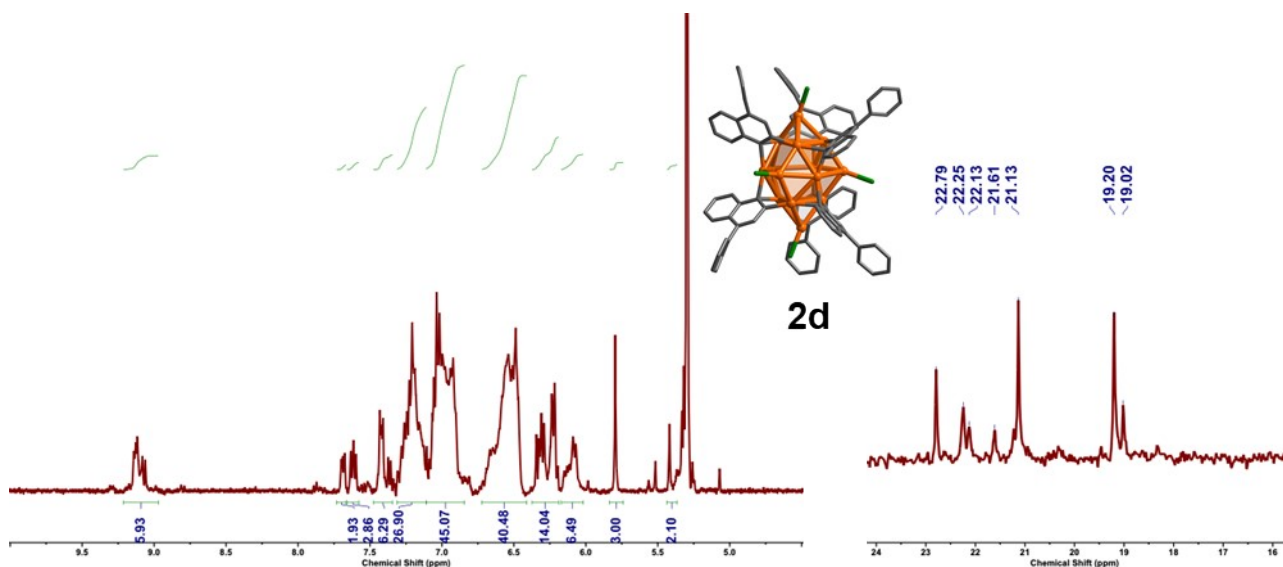

**Fig. S19**  $^1\text{H}$  and  $^{31}\text{P}$  NMR spectra of complex **2d** in  $\text{CD}_2\text{Cl}_2$ . For low symmetry **2d** cluster, we have trouble assigning its NMR signals, but the broad range of peaks in  $^1\text{H}$  NMR and low chemical shifts in  $^{31}\text{P}$  NMR prove the integrity of **2d** assembly.

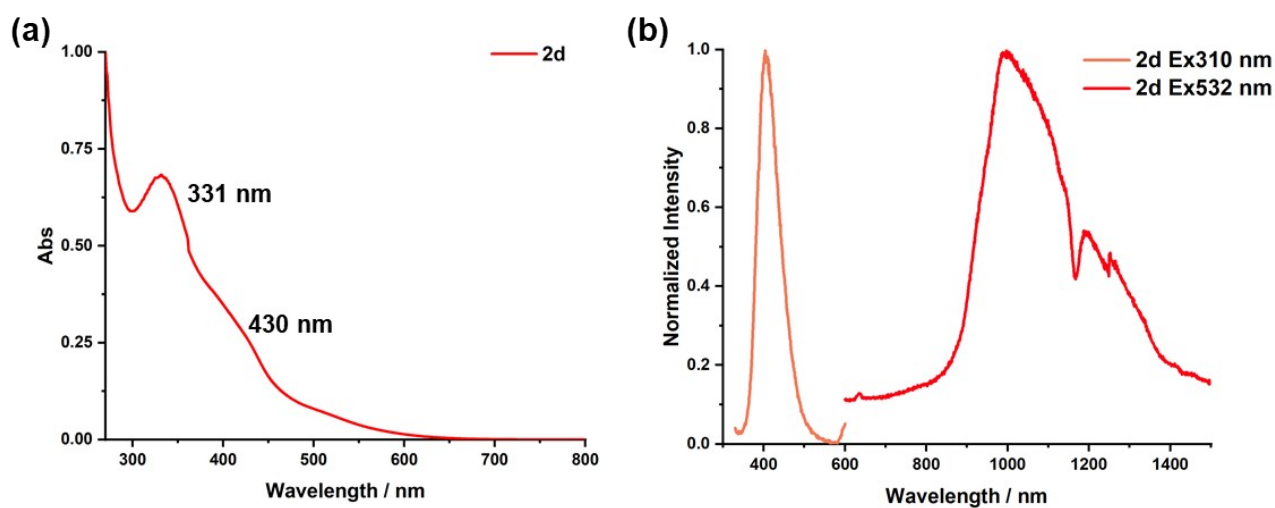

**Fig. S20** UV-vis (a) and emission (b) spectra of complex **2d** in 1,2-dichloroethane. **2d** exhibits a unique near-infrared luminescence.

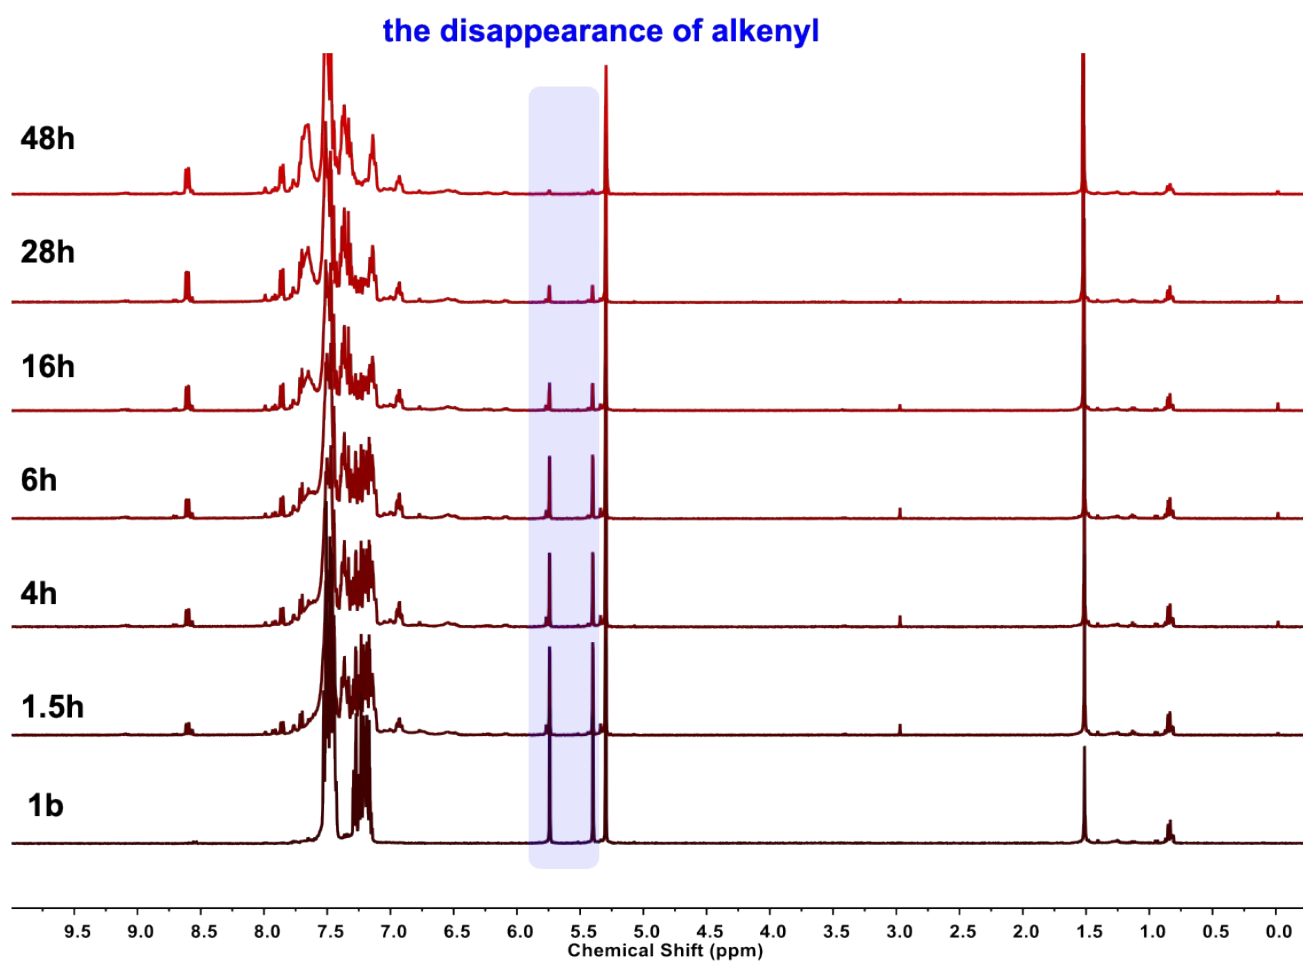

**Fig. S21**  $^1\text{H}$  NMR spectrum of the reaction process monitoring for **2b** to **2d** in  $\text{CD}_2\text{Cl}_2$ .

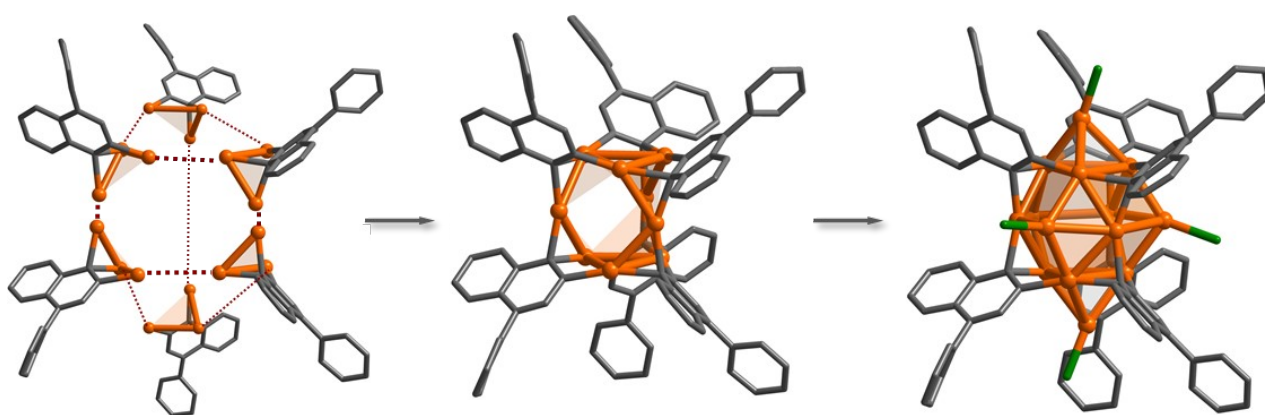

**Fig. S22** The assembly pattern of cluster **2d**.

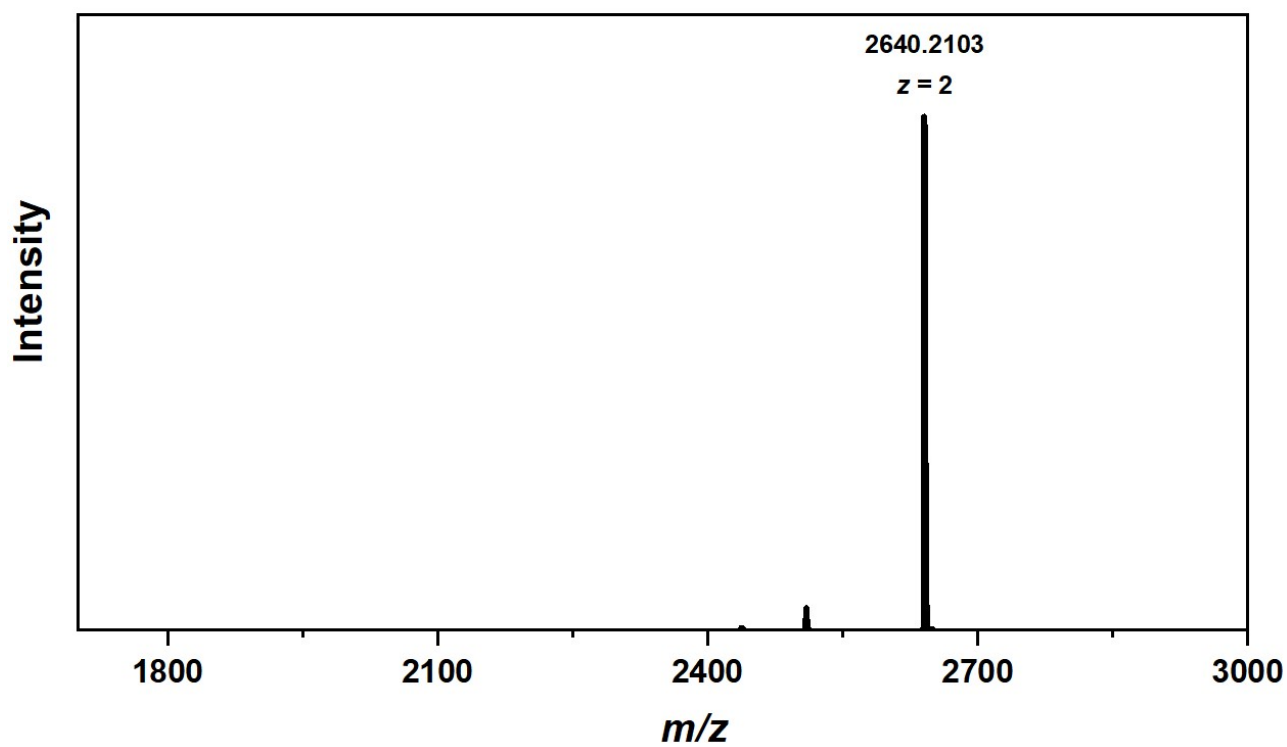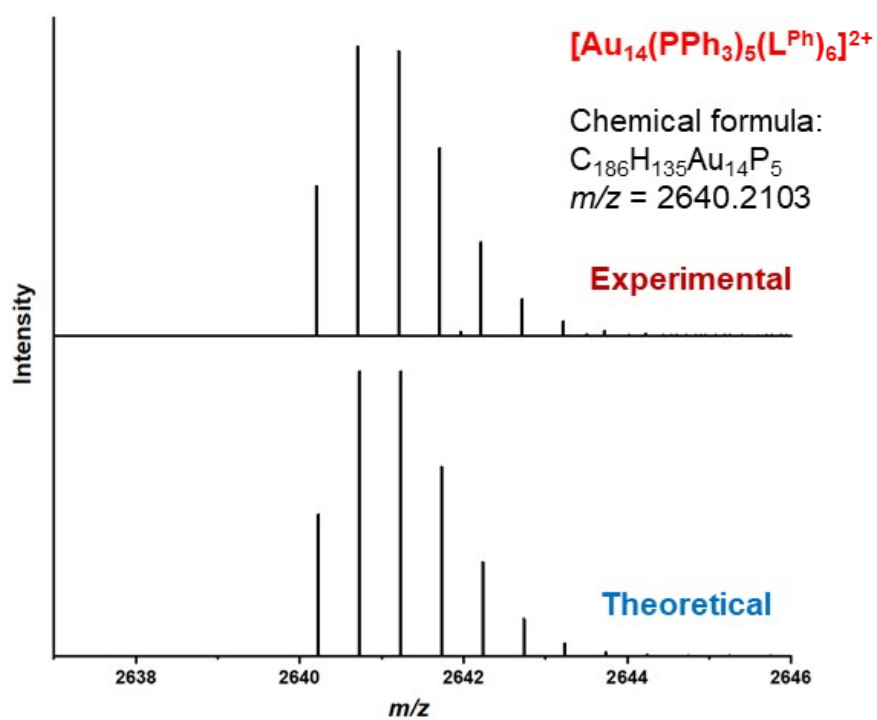

**Fig. S23** High resolution ESI-MS spectra of complex **2d** in 1,2-dichloroethane. Calcd. for  $\text{C}_{186}\text{H}_{135}\text{Au}_{14}\text{P}_5$  2640.2279 ( $[\text{Au}_{14}(\text{PPh}_3)_5(\text{L}^{\text{Ph}})_6]^{2+}$ ), found 2640.2103.

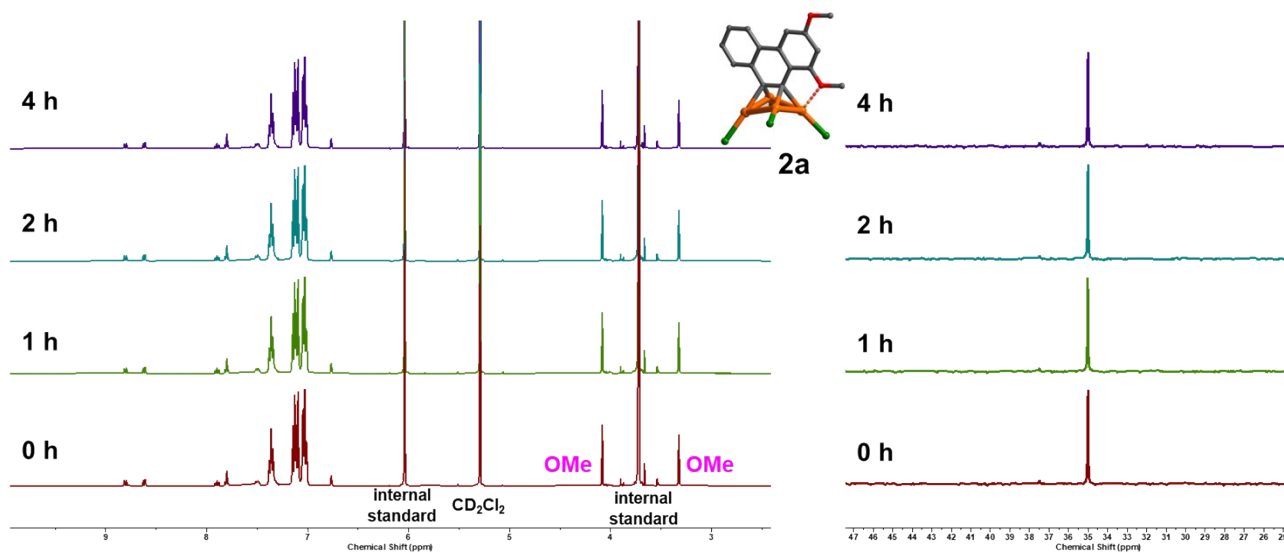

**Fig. S24** The stability test of catalyst **2a** with 1,3,5-trimethoxybenzene as internal standard in CD<sub>2</sub>Cl<sub>2</sub>.

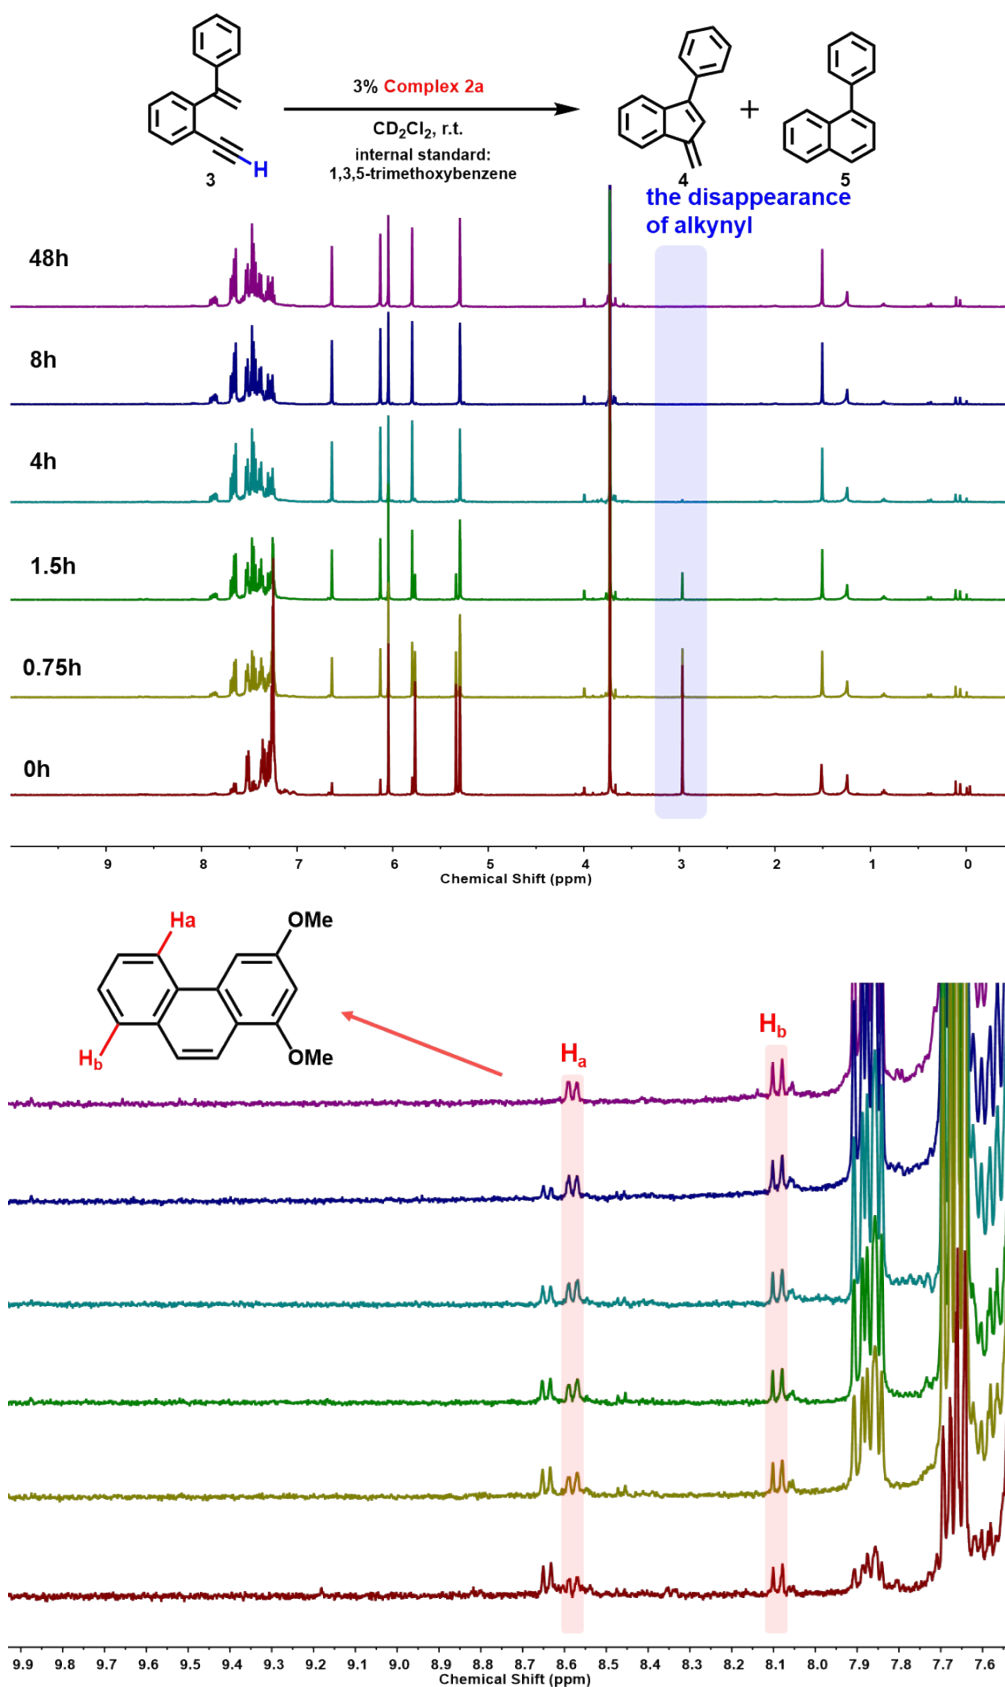

**Fig. S25** (top)  $^1\text{H}$  NMR spectrum of the reaction process monitoring of **2a** catalyzed cyclization of **3**. NMR data of **4** and **5** were consistent with that reported in literature.<sup>13</sup> (down)  $^1\text{H}$  NMR expanded spectrum of the characteristic signals of **2a**.

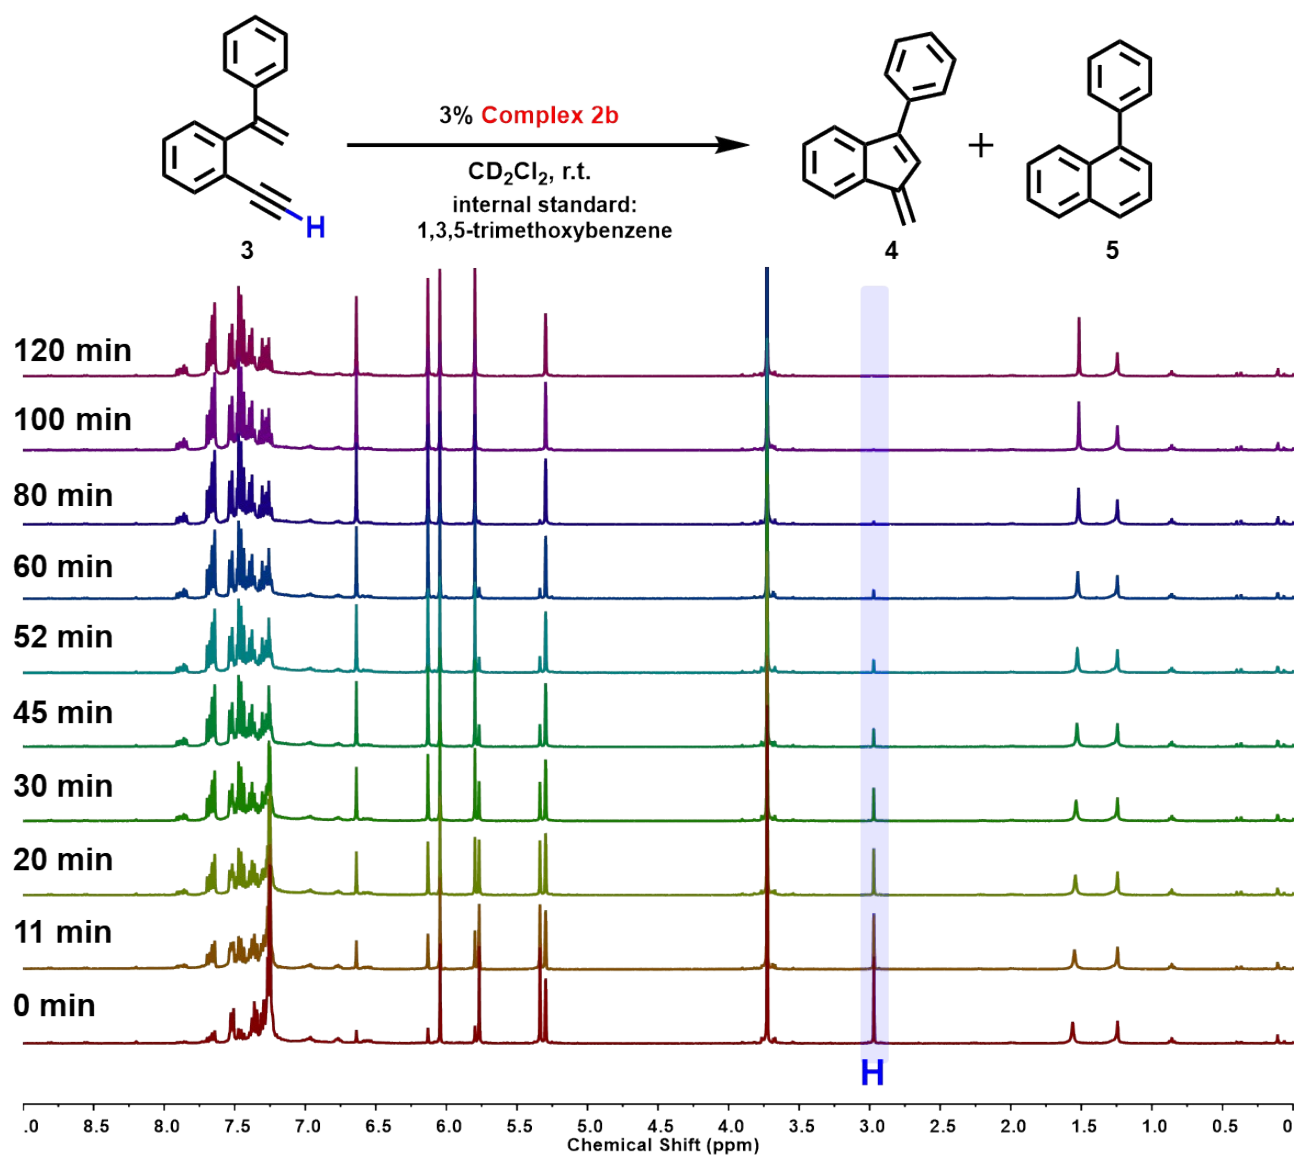

**Fig. S26**  $^1\text{H}$  NMR spectrum of the reaction process monitoring for the entire catalytic procedure of catalyst **2b**.



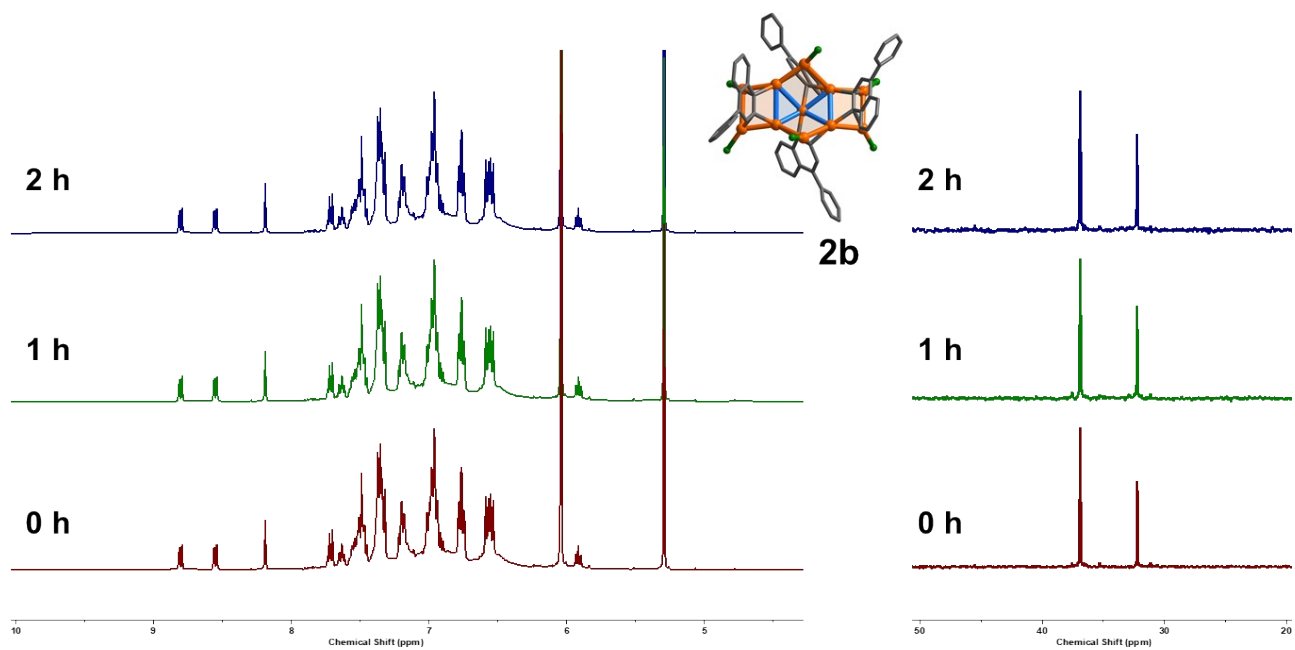

**Fig. S27** The stability test of catalyst **2b** with 1,3,5-trimethoxybenzene as internal standard in  $\text{CD}_2\text{Cl}_2$ .

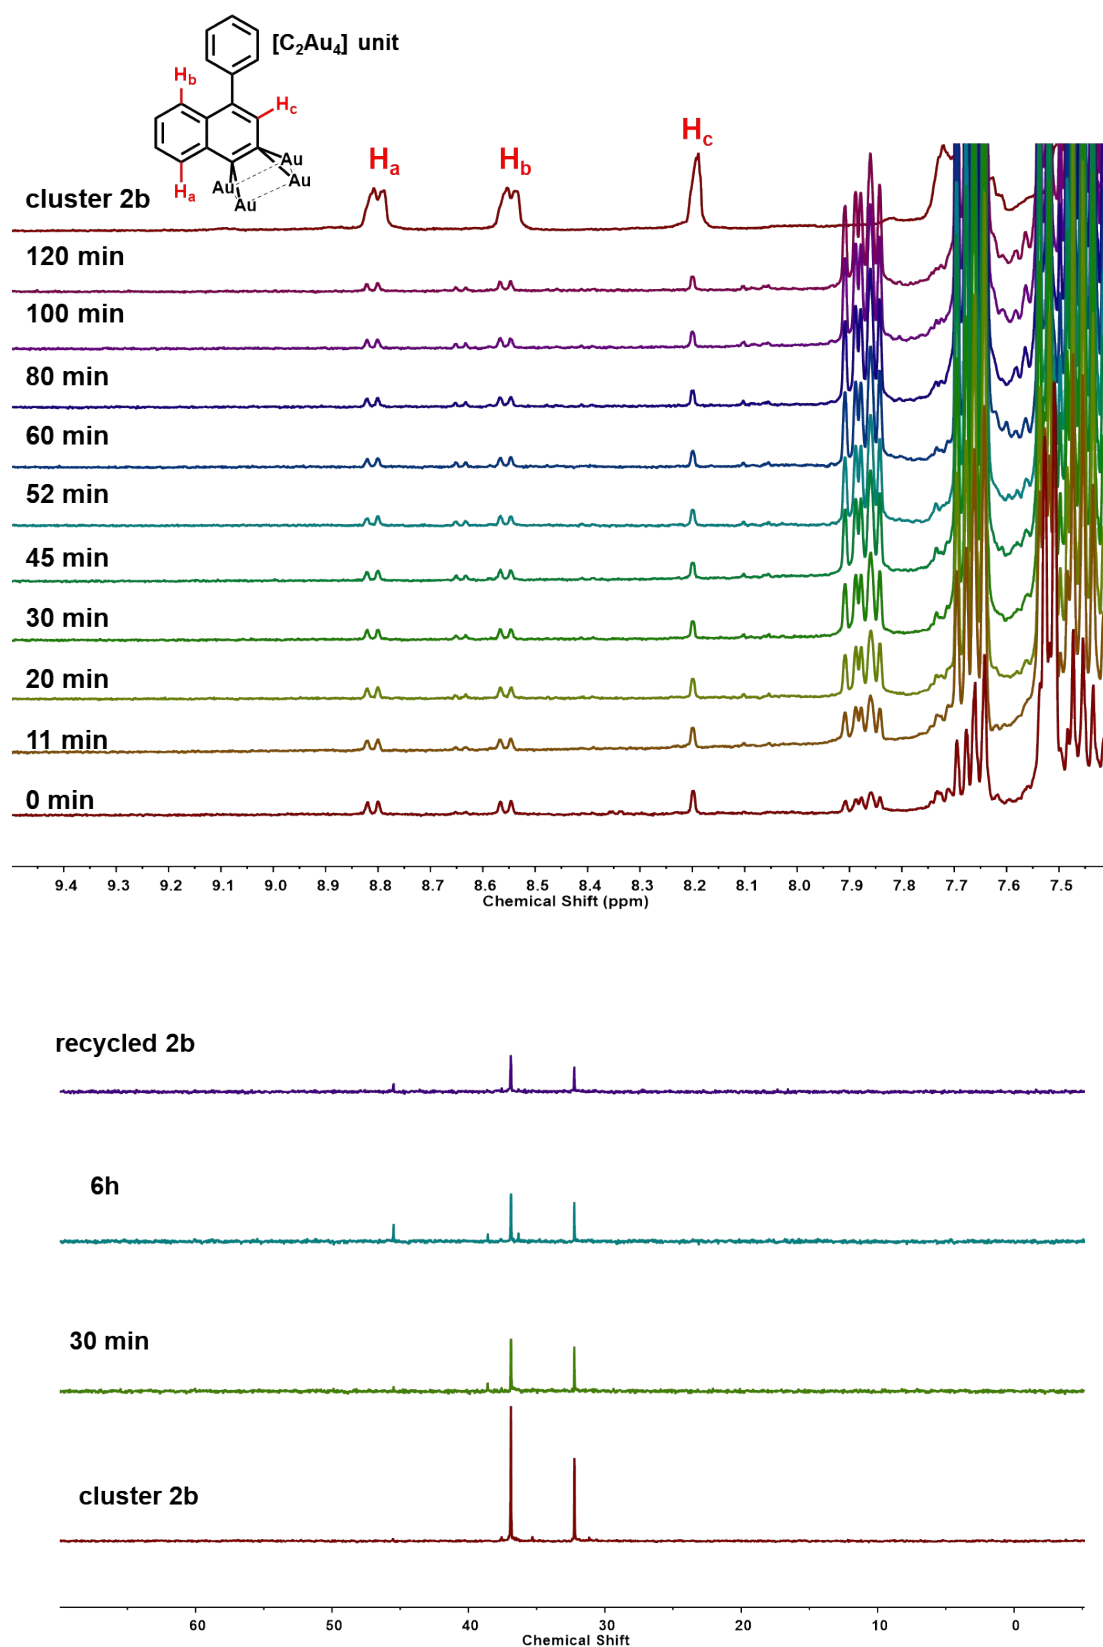

**Fig. S28** (top) Partial enlarged  $^1\text{H}$  NMR spectrum of characteristic peaks of complex **2b** during the catalytic reaction in  $\text{CD}_2\text{Cl}_2$ . (down)  $^{31}\text{P}$  NMR spectrum of catalyst **2b**. The characteristic peak of **2b** had no obvious change, but a new peak of  $[\text{Au}(\text{PPh}_3)_2]^+$  with low concentration appeared at 45.5 ppm. It was indicated that  $[\text{Au}(\text{PPh}_3)]^+$  was involved in the reaction process and a small portion decomposed into  $[\text{Au}(\text{PPh}_3)_2]^+$ .

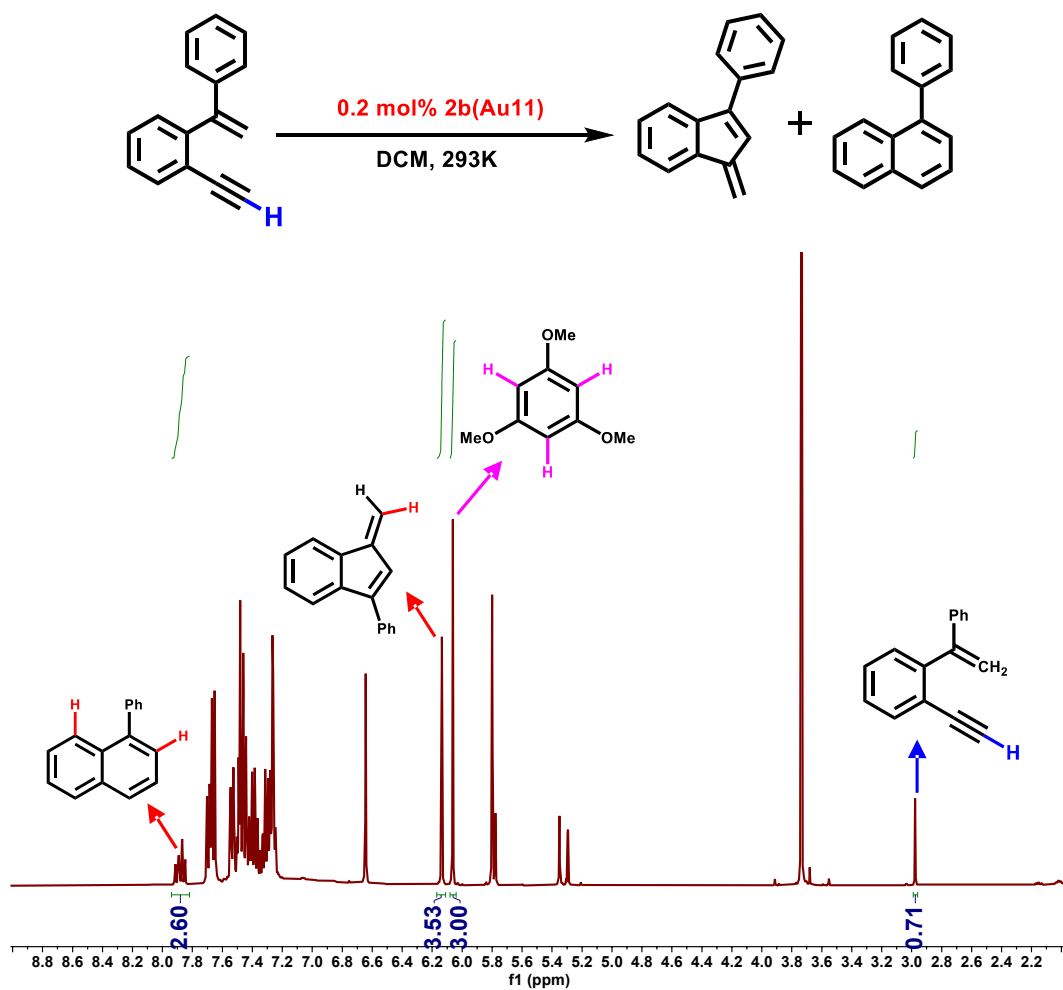

**Fig. S29** The TON of the reaction with clusters **2b**. In a 5 mL glass bottle, enyne substrate **3** (18.5 mg, 0.09 mmol), **2b** (1.0 mg,  $1.8 \times 10^{-4}$  mmol) were combined in  $\text{CH}_2\text{Cl}_2$  (0.5 mL) at 293K. After the reactions were completed, we added 1,3,5-trimethoxybenzene (0.015 mmol, 2.5 mg) as internal standard and analyze the reaction systems by  $^1\text{H}$  NMR spectra. The TON of **2b** is 403.

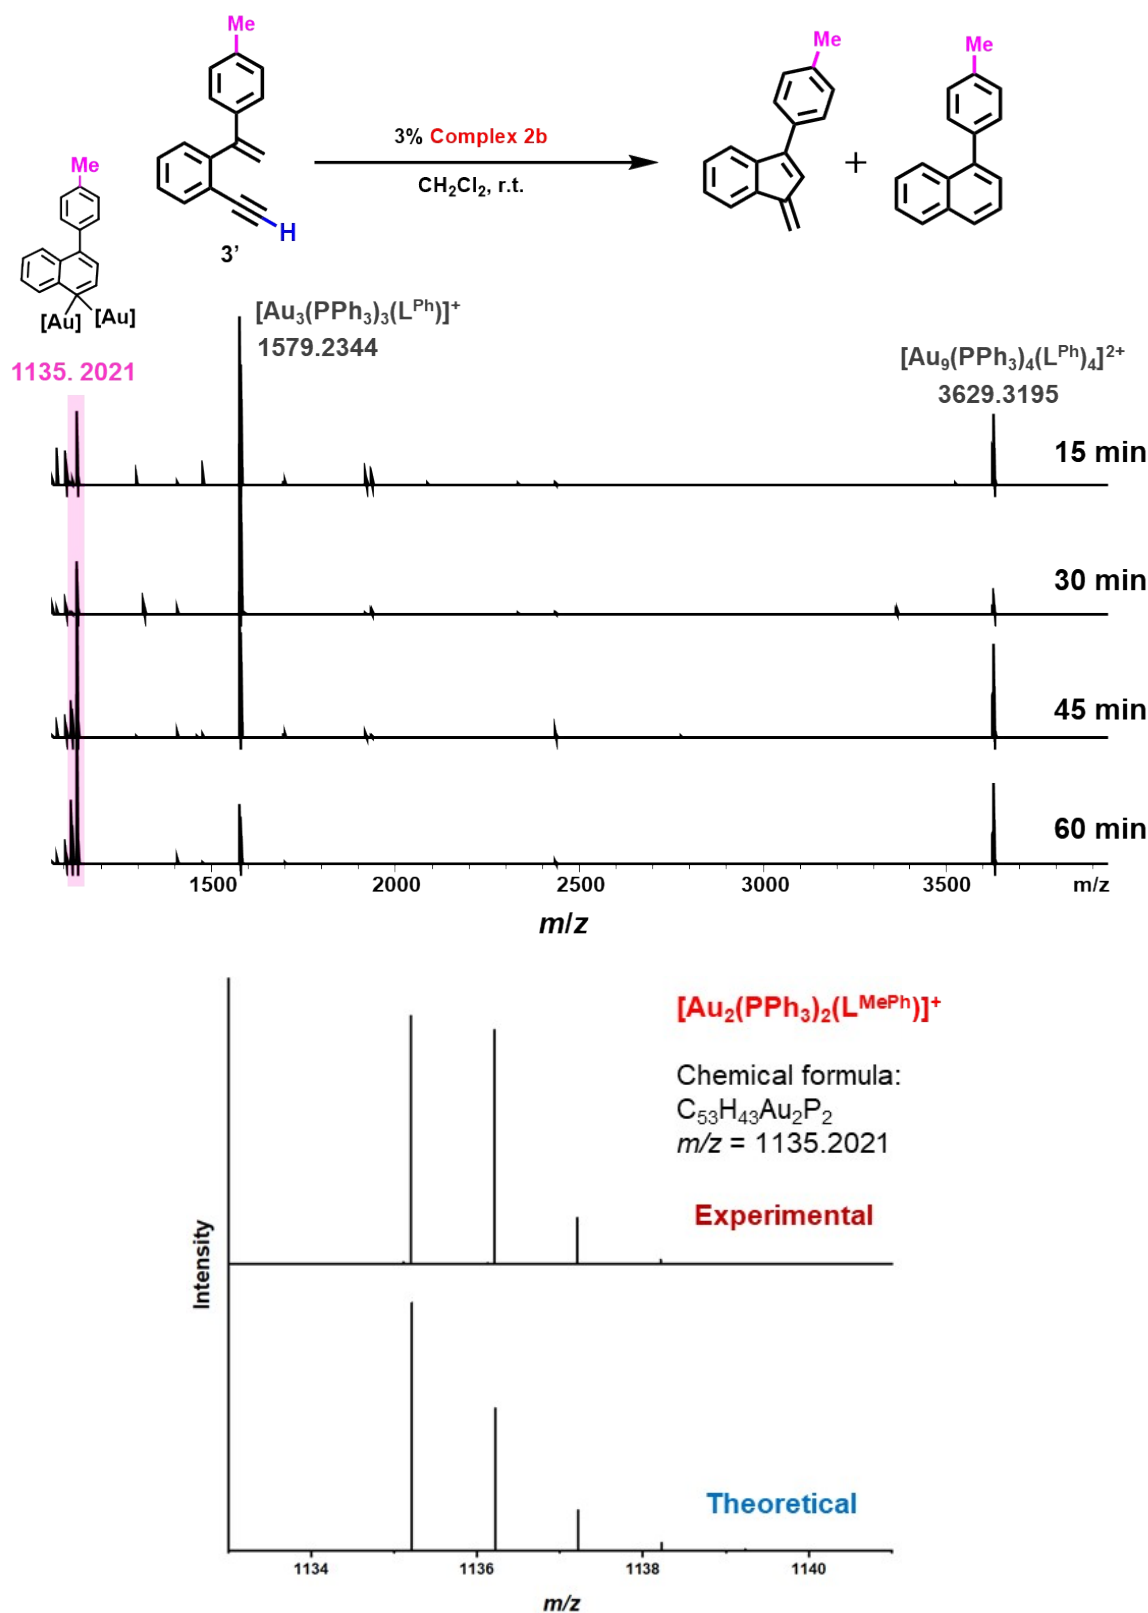

**Fig. S30** ESI-MS spectrum of catalyst **2b** during the overcross catalytic reaction in  $\text{CH}_2\text{Cl}_2$ . Due to the inherent nature of **2b**, it was difficult to detect the completed molecular ion peak, and only some fragment peaks could be observed. Specially, we found symbolic *gem*-diaurated species ( $m/z$  values of 1135.2021) for  $[\text{Au}(\text{PPh}_3)]^+$  catalytic system (calcd. for  $\text{C}_{53}\text{H}_{43}\text{Au}_2\text{P}_2$  1135.2166 ( $[\text{Au}_2(\text{PPh}_3)_2(\text{L}^{\text{MePh}})]^+$ )).

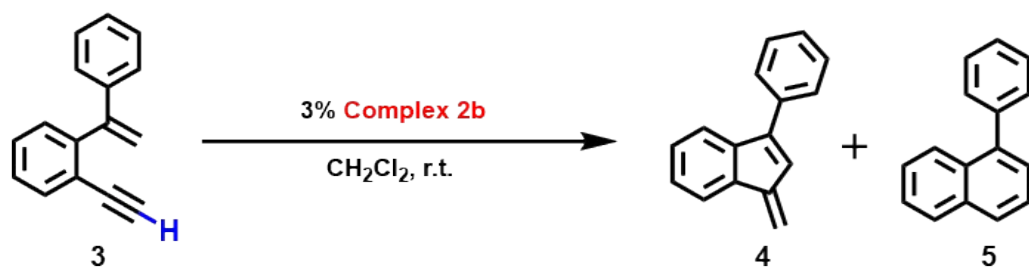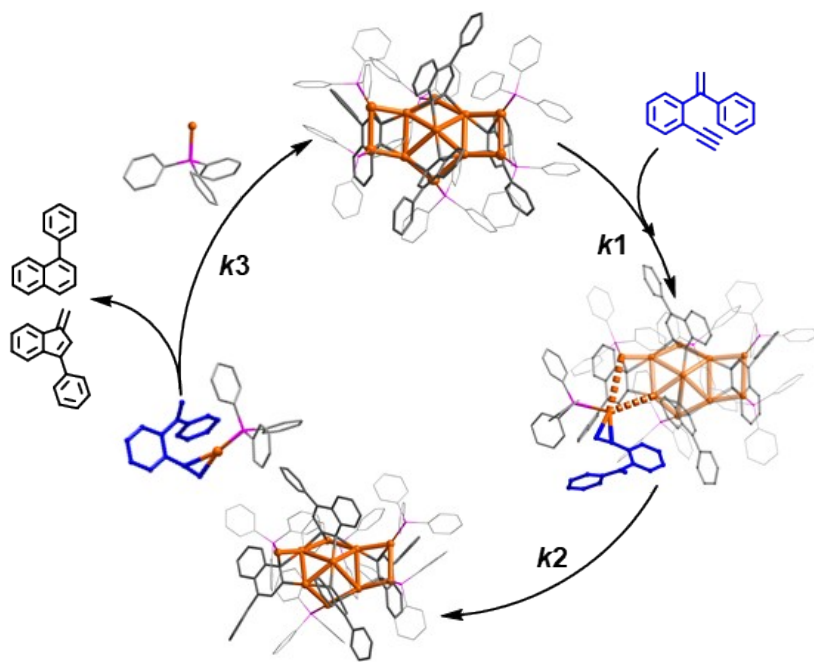

According to the well-established mechanism,  
 a rate law of the form:  $\text{rate} = -k(k_1, k_2, k_3)[\text{Au}_{11}][3] = -K_{\text{obs}}[3]$  can be derived.

**Fig. S31** Proposed mechanism for the cyclization reaction catalyzed by **2b** and the kinetic analyses of the reaction.

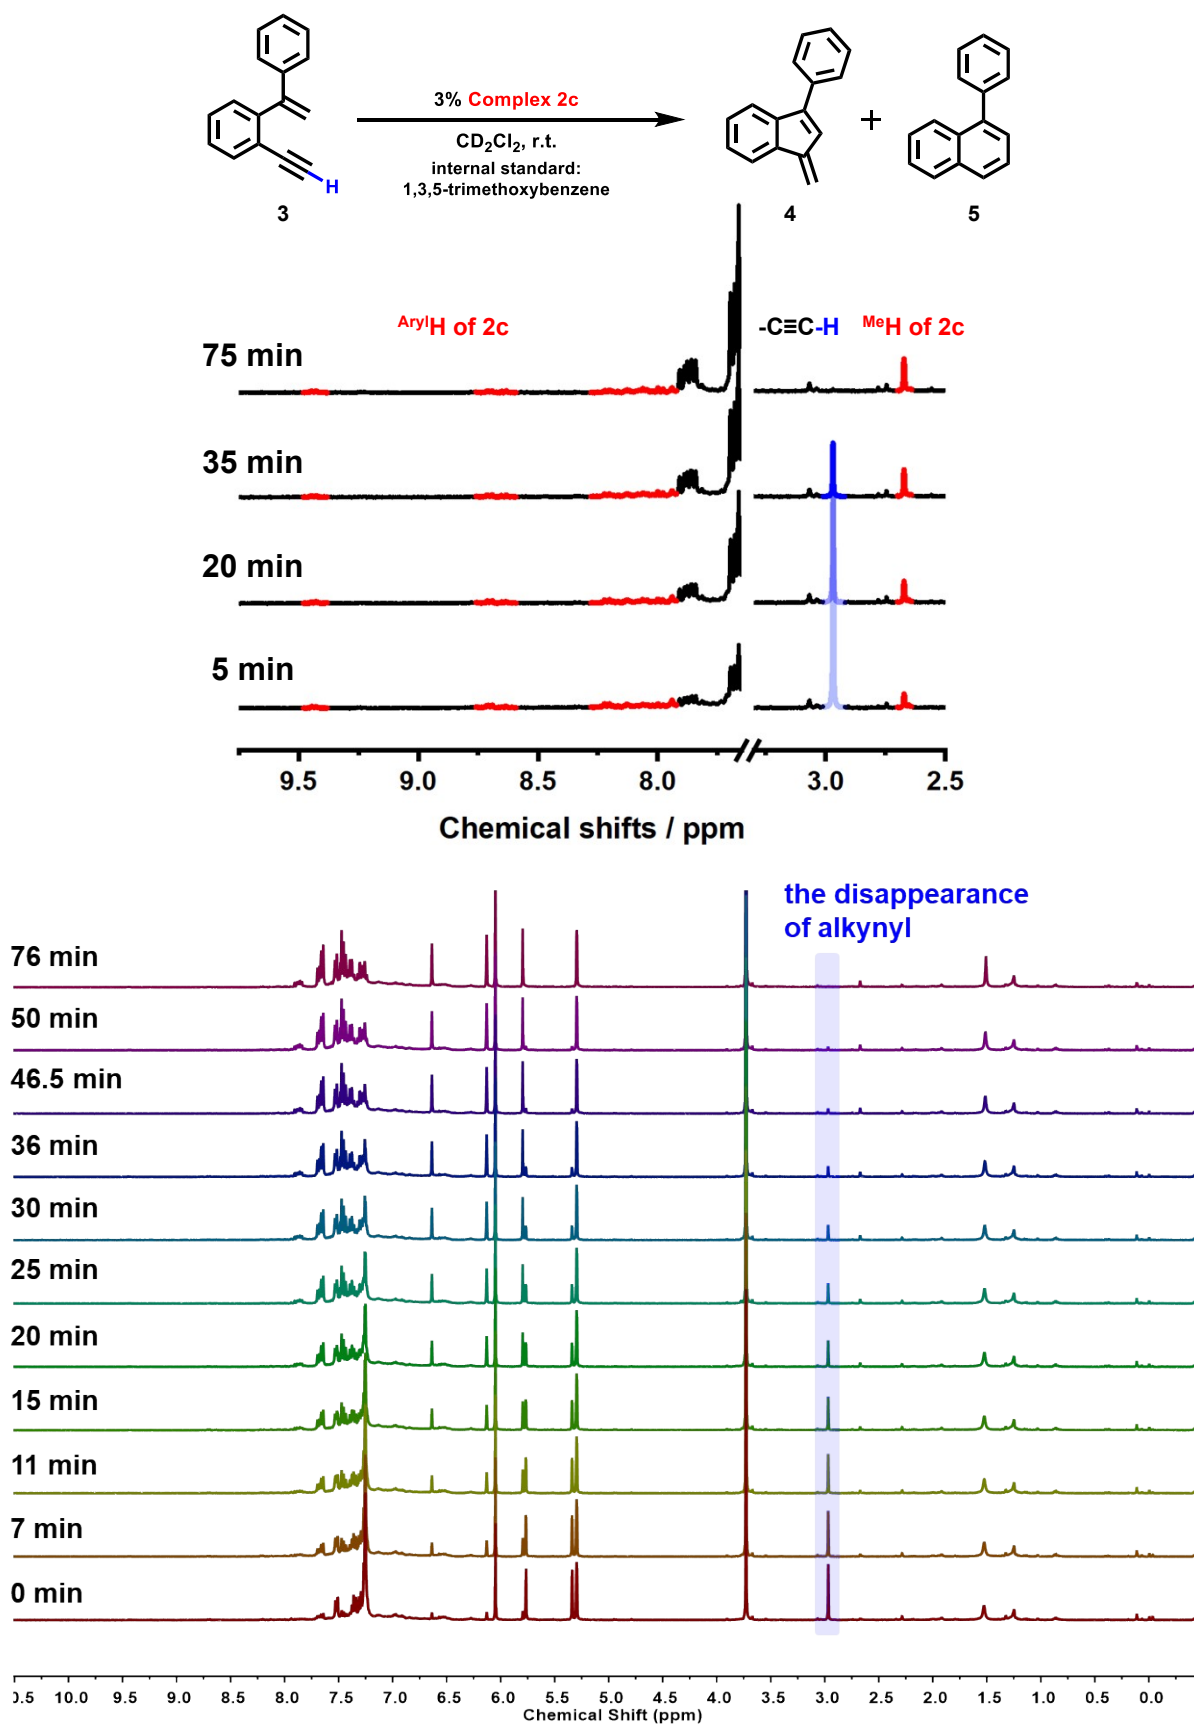

**Fig. S32 (top)**  $^1H$  NMR monitoring of the catalytic procedure of catalyst **2c**. Red lines represent the cluster structure peak, and blue lines represent the decline of the alkyne peak. (down)  $^1H$  NMR spectrum of the entire catalytic procedure.

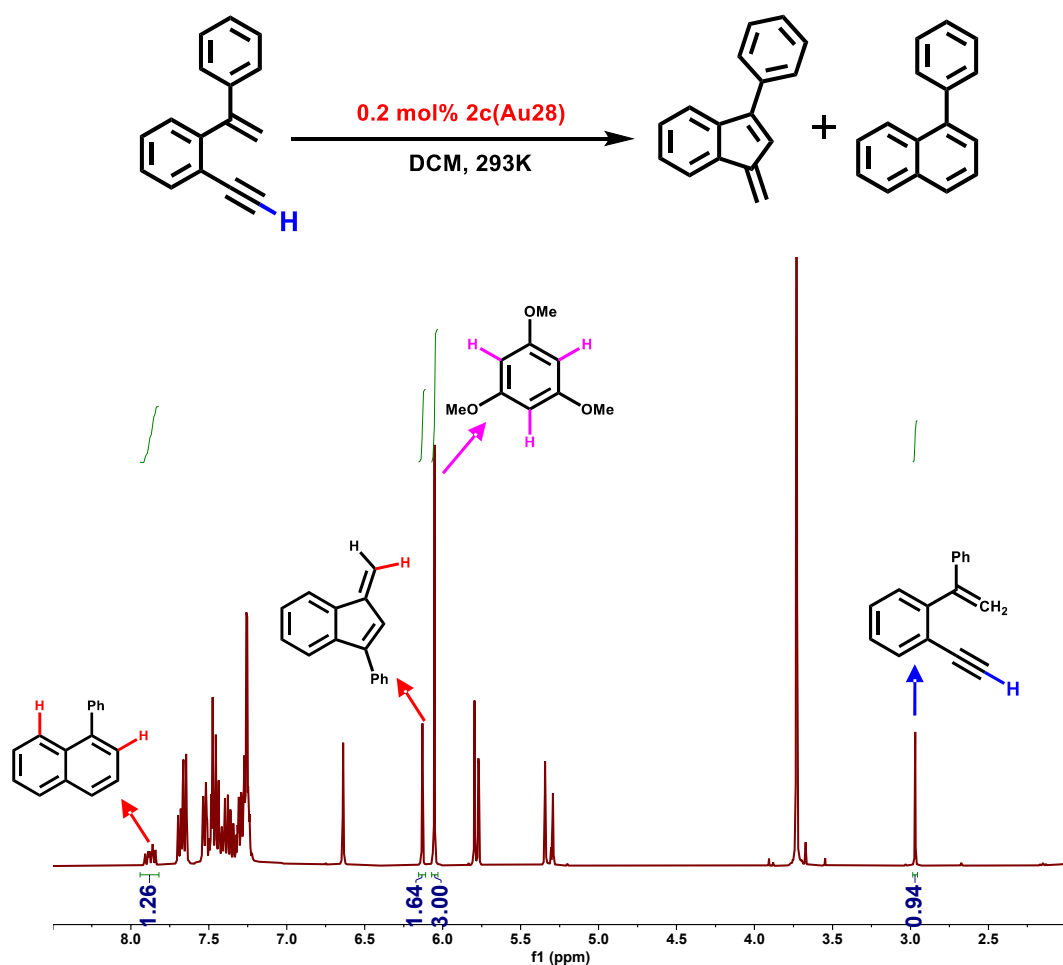

**Fig. S33** The TON of the reaction with clusters **2c**. In a 5 mL glass bottle, enyne substrate **3** (10.3 mg, 0.05 mmol), **2c** (1.0 mg,  $1 \times 10^{-4}$  mmol) were combined in CH<sub>2</sub>Cl<sub>2</sub> (0.3 mL) at 293K. After the reactions were completed, we added 1,3,5-trimethoxybenzene (0.015 mmol, 2.5 mg) as internal standard and analyze the reaction systems by <sup>1</sup>H NMR spectra. The TON of **2c** is 341.

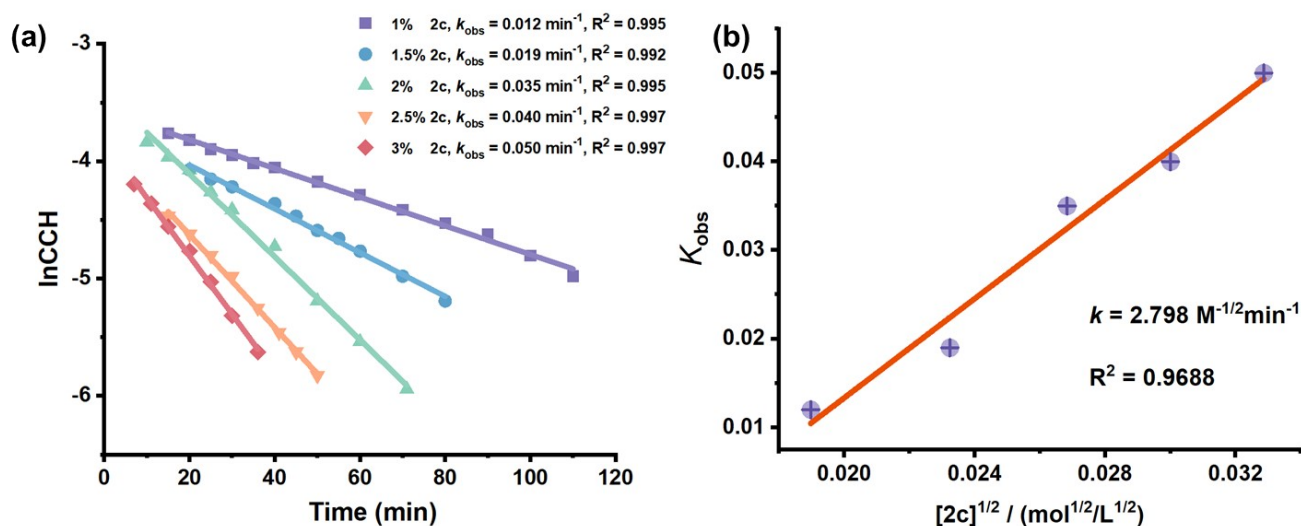

**Fig. S34** (a) Pseudo-first-order kinetic curves of **2c** catalyzed reactions. (b) Kinetic curves of **2c** depended on the catalyst concentration.

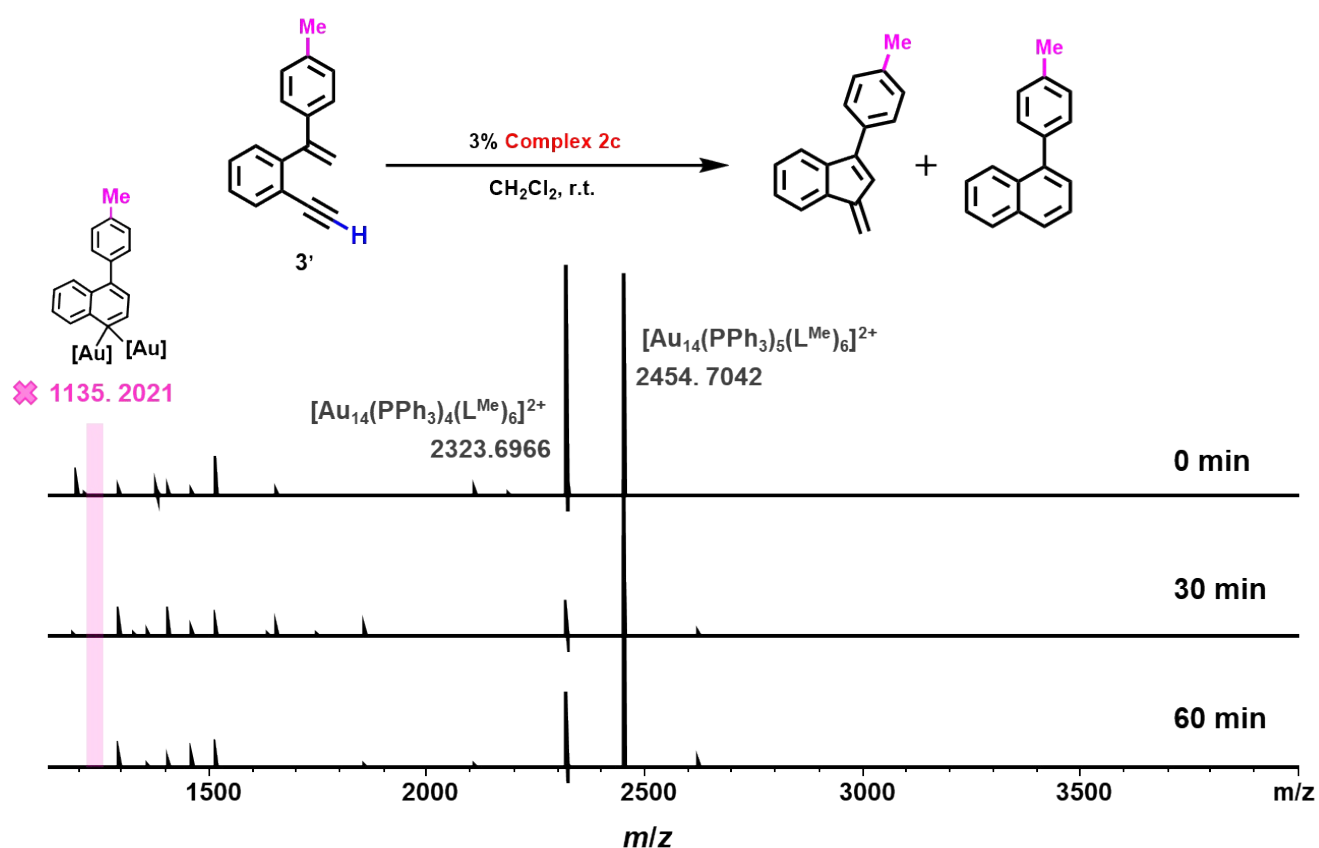

**Fig. S35** ESI-MS spectrum of catalyst **2c** during the overcross catalytic reaction in  $\text{CH}_2\text{Cl}_2$ . The characteristic peak of **2c** had no obvious change and *gem*-diaurated species for  $[\text{Au}(\text{PPh}_3)]^+$  catalytic system were not found.



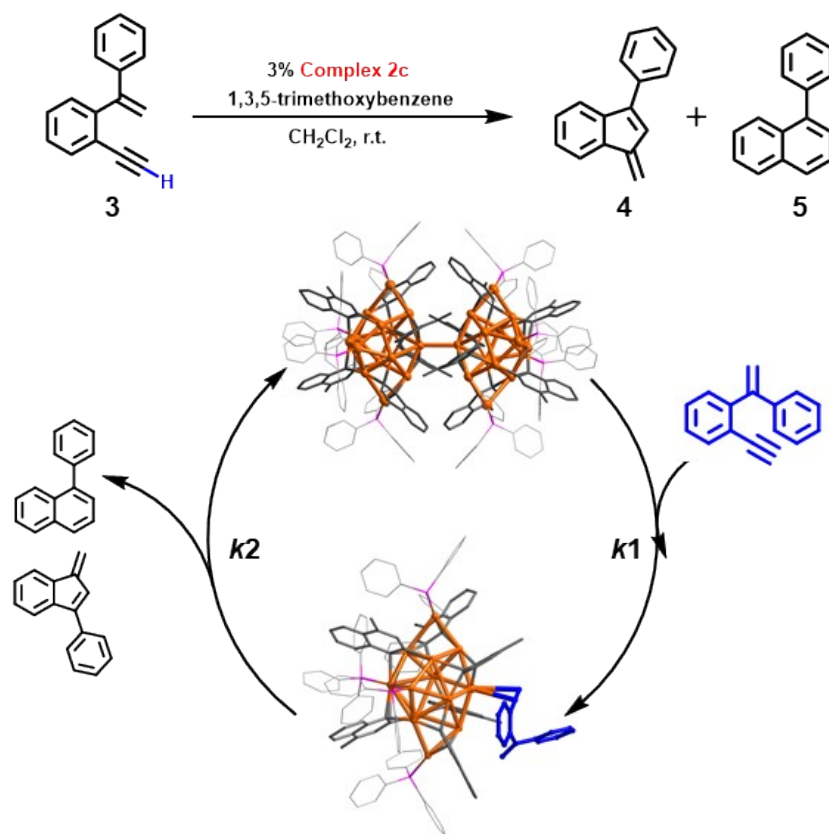

According to the well-established mechanism,  
 a rate law of the form:  $\text{rate} = -k(k_1, k_2)[\text{MeAu}_{14}][\mathbf{3}] = -K_{\text{obs}}[\mathbf{3}]$  can be derived.

$$[\text{Au}_{28}] \rightleftharpoons 2[\text{MeAu}_{14}], K_{\text{eq}} = \frac{[\text{MeAu}_{14}]^2}{[\text{Au}_{28}]}, [\text{MeAu}_{14}] = [K_{\text{eq}}[\text{Au}_{28}]]^{1/2}$$

$$\text{Thus, rate} = -k(k_1, k_2, K_{\text{eq}})[\text{Au}_{28}]^{1/2} [\mathbf{3}]$$

**Fig. S36** Proposed mechanism for the cyclization reaction catalyzed by **2c** and the kinetic analyses of the reaction.

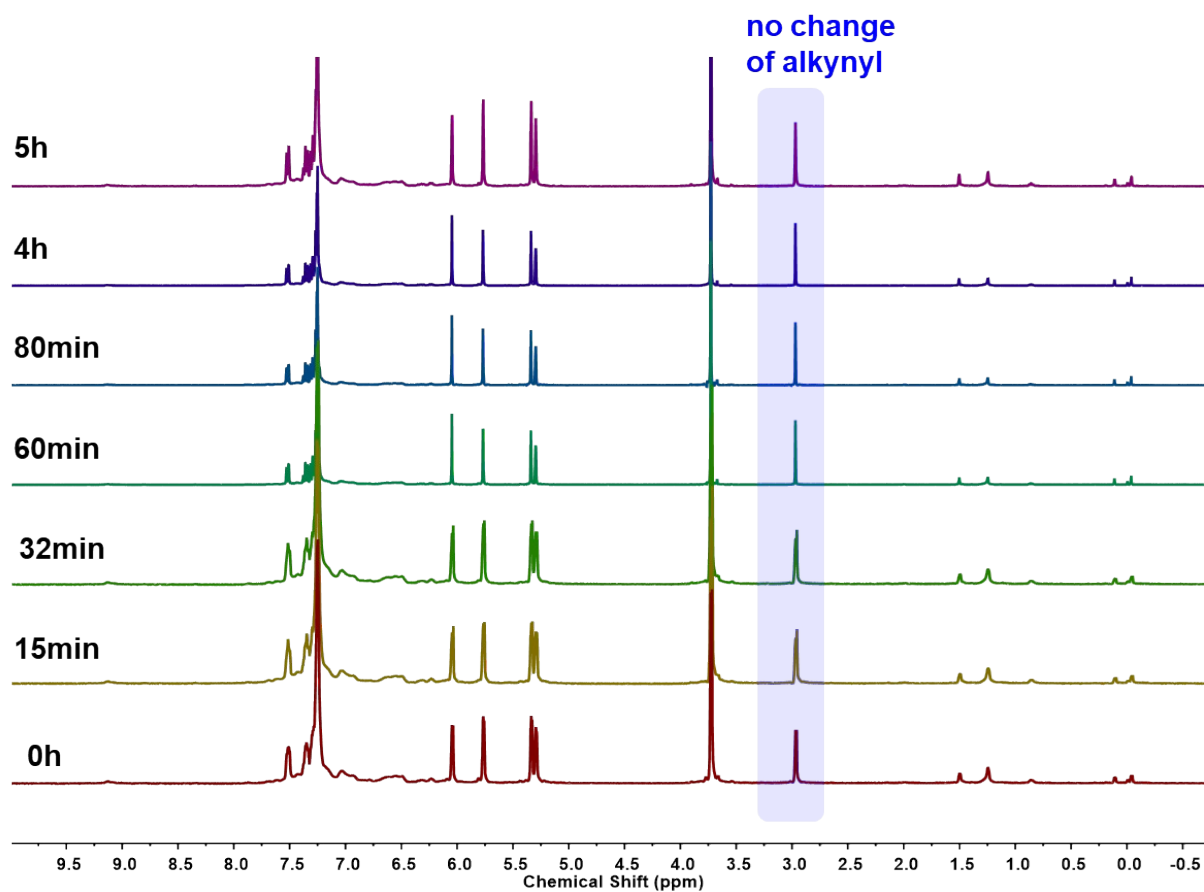

**Fig. S37**  $^1\text{H}$  NMR spectrum of the reaction process monitoring of **2d** catalyzed cyclization of **3**.

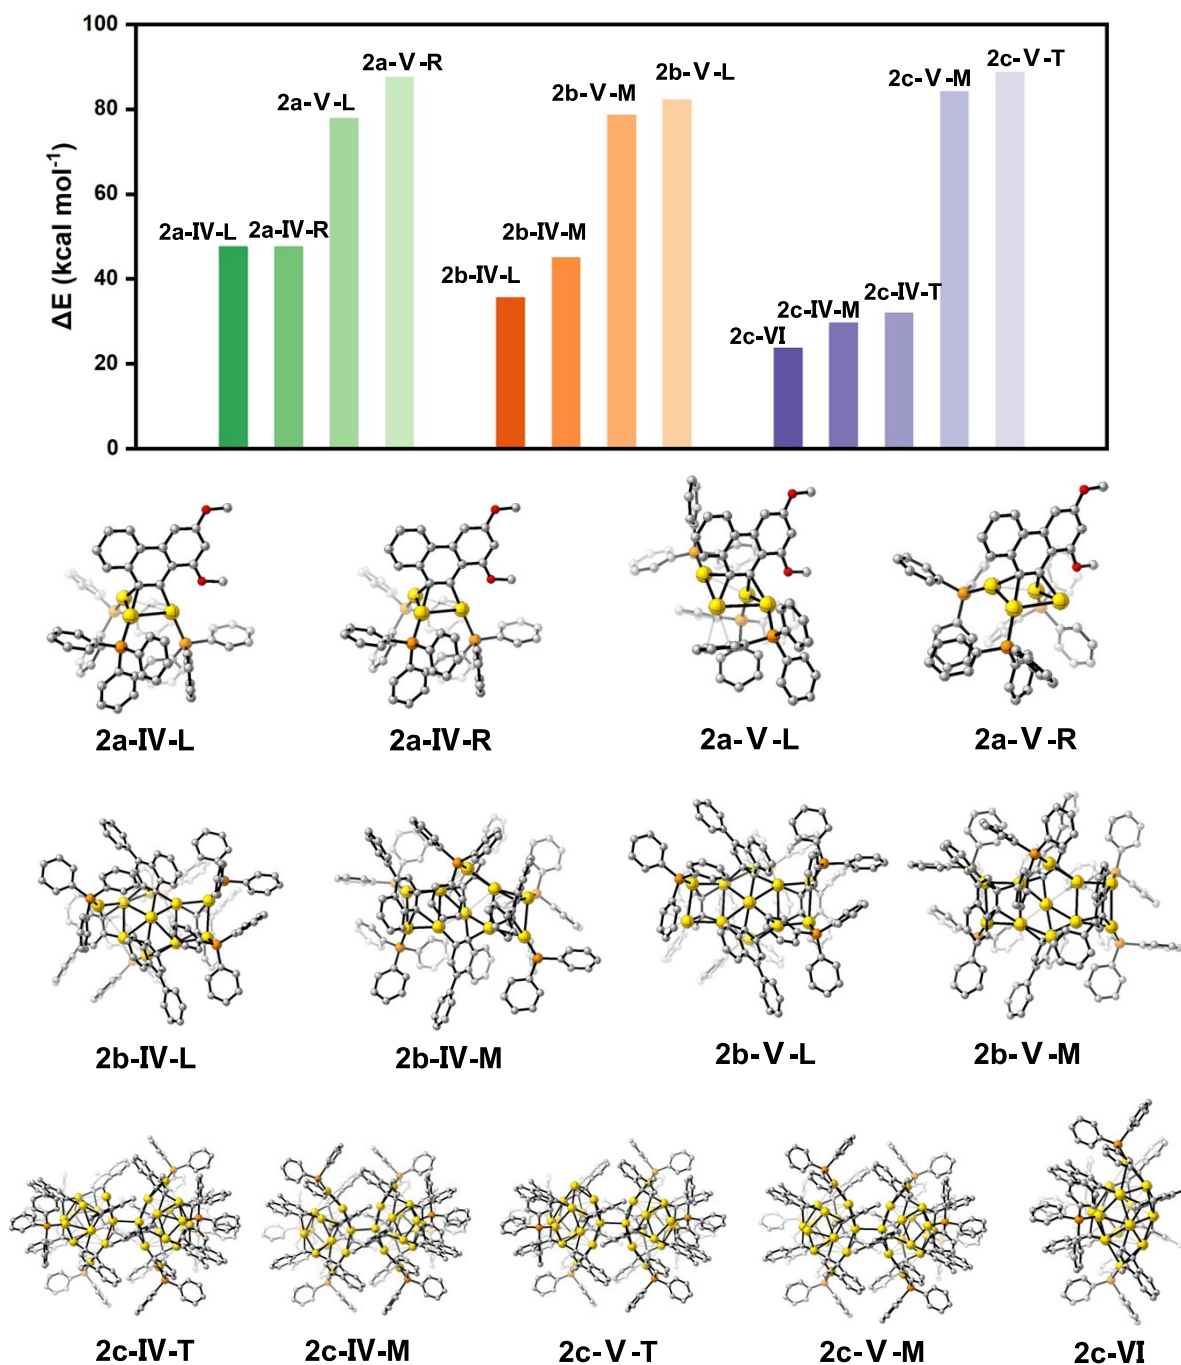

**Fig. S38** DFT results for energies ( $\text{kcal mol}^{-1}$ ) of the cluster stability. (top) Comparison of the energetics ( $\Delta E$ ) of different dissociation types of metal clusters **2a-2c**. (down) The structures of dissociation products, **IV** represents that clusters undergo the removal of  $[\text{Au}(\text{PPh}_3)]^+$  fragment, **V** represents that clusters undergo synergistic coordination of the alkyne and dissociation of the  $\text{PPh}_3$ , and **VI** depicts the pathway for the dissociation of **2c** into two  $\text{MeAu}_{14}$  units. There are two chemical non-equivalent Au sites in each structure: L, left; R, right; M, middle; T, top.

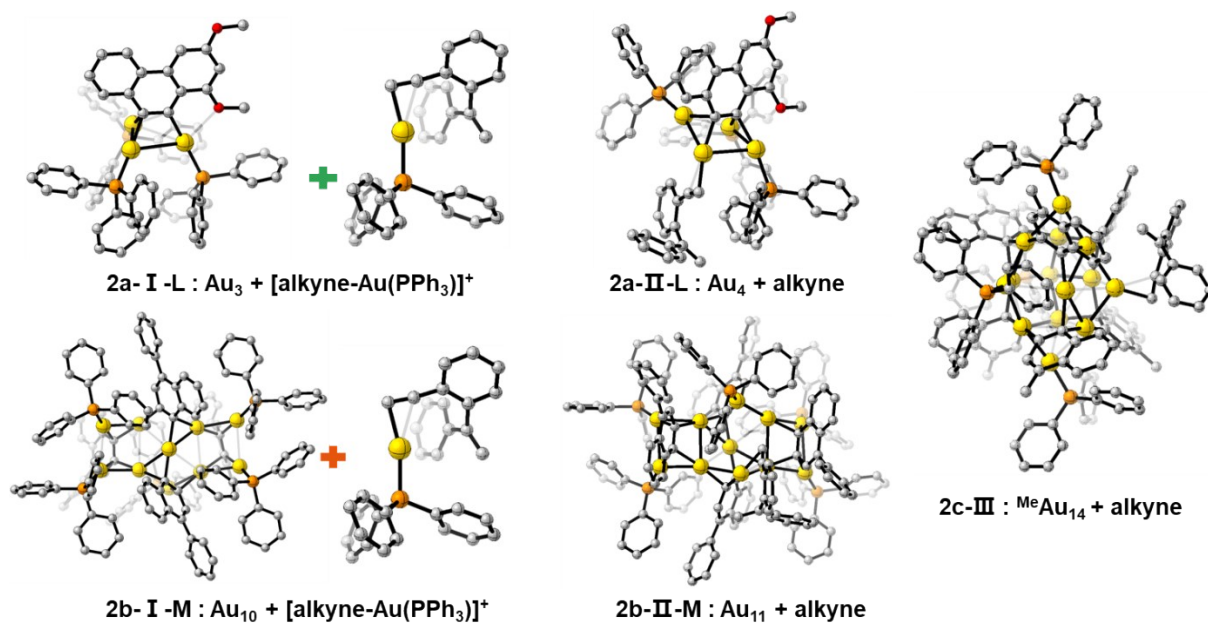

**Fig. S39** Complementary structures of intermediates of clusters **2a-2c** in Figure 5 (L, left; R, right; M, middle).

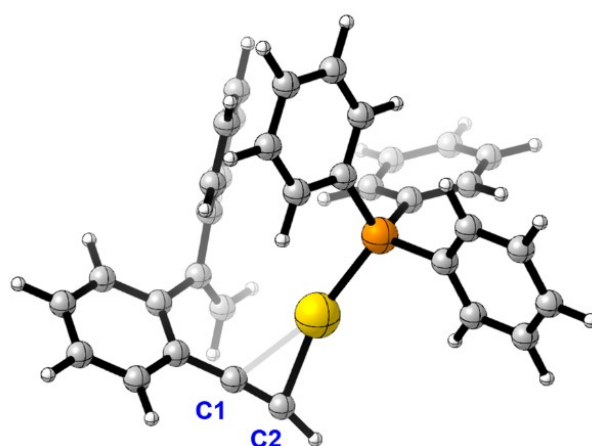

| atomic charge | C1<br>(5- <i>exo-dig</i> ) | C2<br>(6- <i>endo-dig</i> ) |
|---------------|----------------------------|-----------------------------|
| Hirshfeld     | 0.0152                     | -0.0609                     |
| Mulliken      | 0.177                      | -0.205                      |
| ADCH          | -0.150                     | -0.409                      |

**Fig. S40** Atomic charge calculation for [alkyne-Au(PPh<sub>3</sub>)]<sup>+</sup>. The Hirshfeld, Mulliken and ADCH atomic charge are more positive for C1 than C2, which indicated C1 is more electrophilic than C2 and easily attacked by alkenyl group to give five-membered ring product.

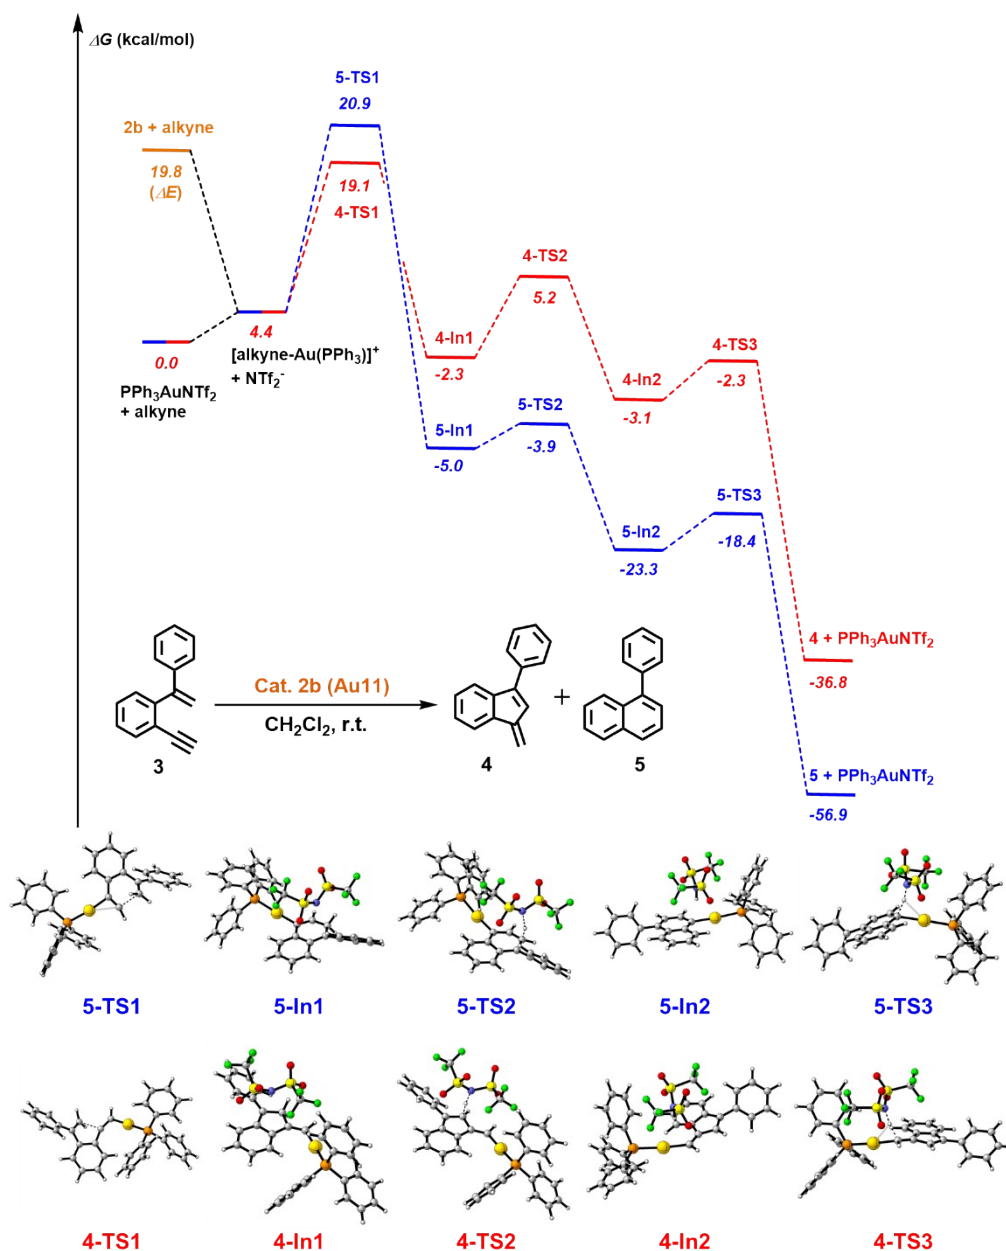

**Fig. S41** Potential energy profile of single-point energies (for **2b** and Au<sub>10</sub>) combined with Gibbs free energy (for mononuclear species). Gibbs free energies and single point energies are in kcal mol<sup>-1</sup>. Relative energies (kcal mol<sup>-1</sup>): PPh<sub>3</sub>AuNTf<sub>2</sub> + Au<sub>10</sub> + alkyne = 0, **2b** + alkyne = 19.8, [alkyne-Au(PPh<sub>3</sub>)]<sup>+</sup> + NTf<sub>2</sub><sup>-</sup> + Au<sub>10</sub> = 4.4, **4-TS1** + Au<sub>10</sub> = 19.1, **4-In1** + Au<sub>10</sub> = -2.3, **4-TS2** + Au<sub>10</sub> = 5.2, **4-In2** + Au<sub>10</sub> = -3.1, **4-TS3** + Au<sub>10</sub> = -2.3, **4** + PPh<sub>3</sub>AuNTf<sub>2</sub> + Au<sub>10</sub> = -36.8. **5-TS1** + Au<sub>10</sub> = 20.9, **5-In1** + Au<sub>10</sub> = -5.0, **5-TS2** + Au<sub>10</sub> = -3.9, **5-In2** + Au<sub>10</sub> = -23.3, **5-TS3** + Au<sub>10</sub> = -18.4, **5** + PPh<sub>3</sub>AuNTf<sub>2</sub> + Au<sub>10</sub> = -56.9.

## Supplementary Spectrum.

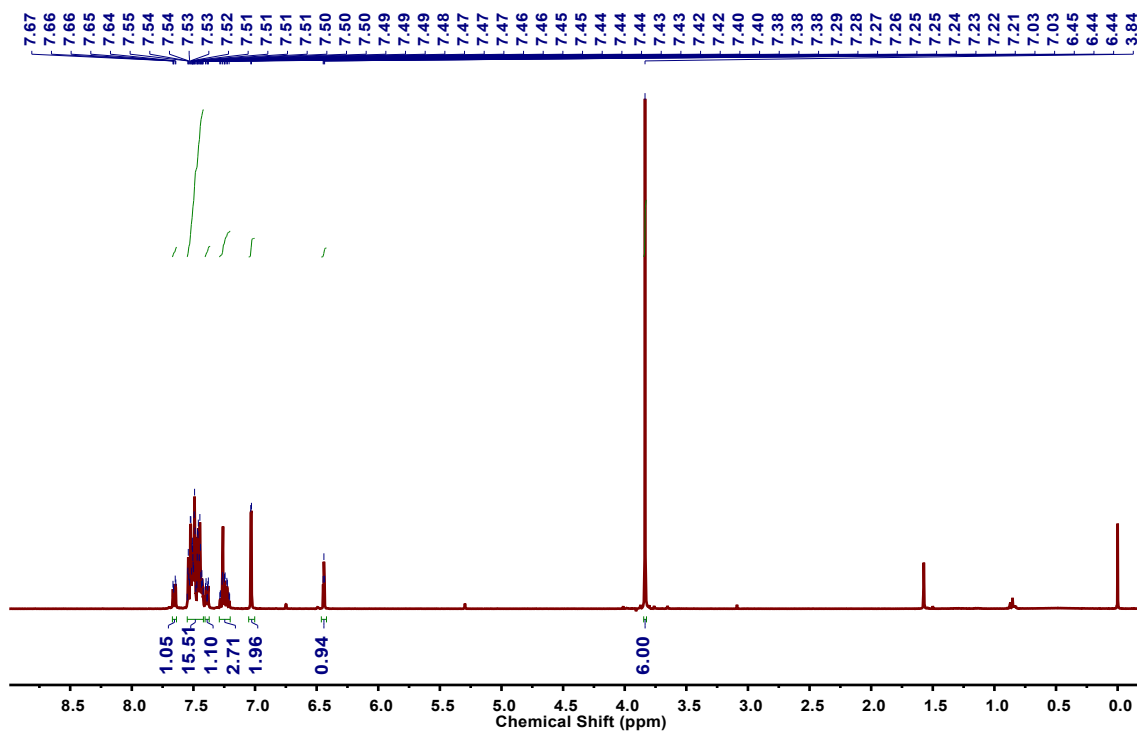

Fig. S42  $^1\text{H}$  NMR spectrum (400 MHz,  $\text{CDCl}_3$ , 298 K) of **1a**.

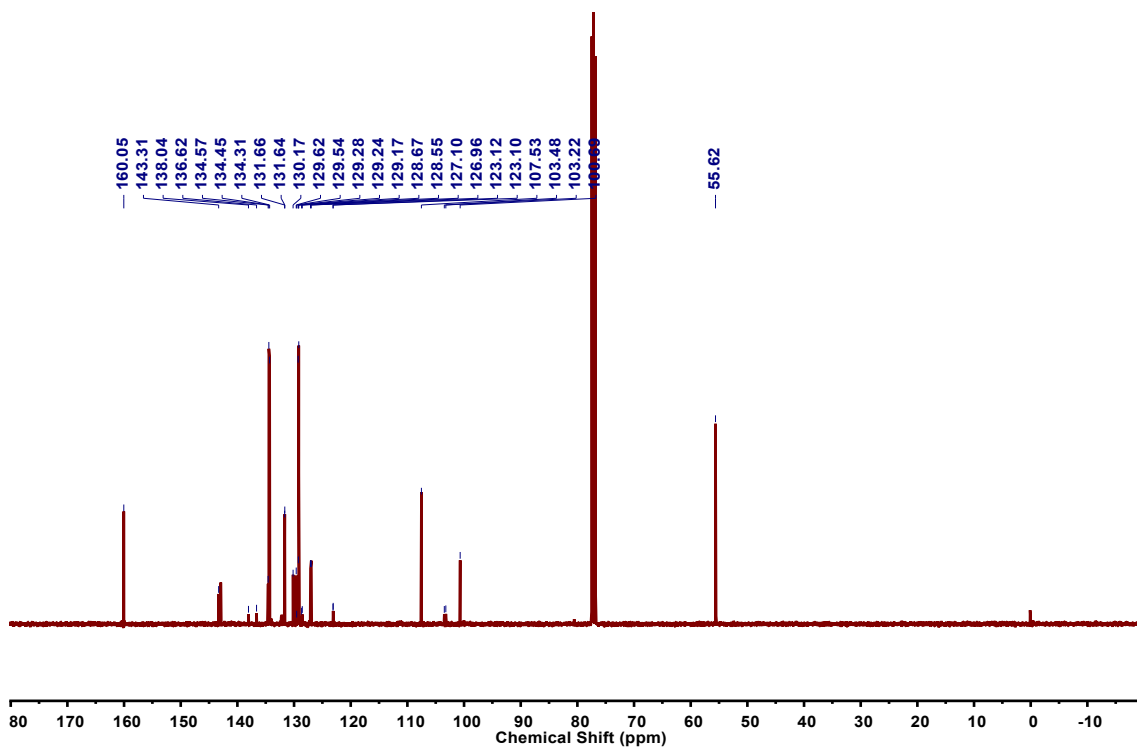

Fig. S43  $^{13}\text{C}$  NMR spectrum (100 MHz,  $\text{CDCl}_3$ , 298 K) of **1a**.

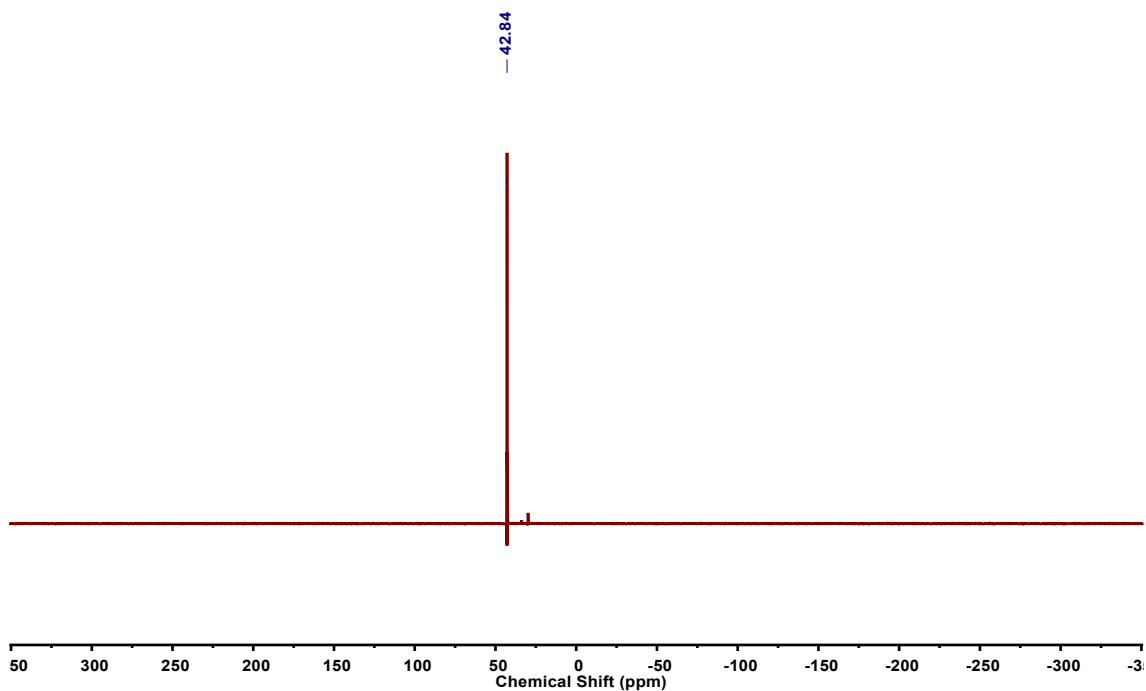

Fig. S44 <sup>31</sup>P NMR spectrum (162 MHz, CDCl<sub>3</sub>, 298 K) of **1a**.

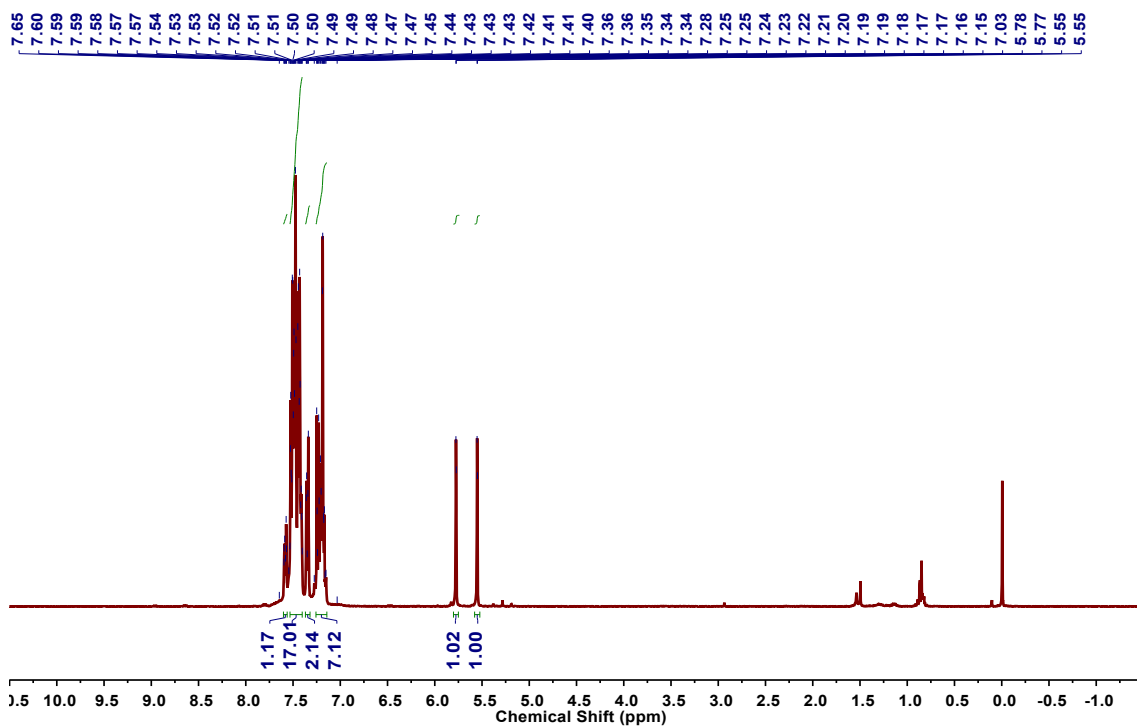

Fig. S45 <sup>1</sup>H NMR spectrum (400 MHz, CDCl<sub>3</sub>, 298 K) of **1b**.

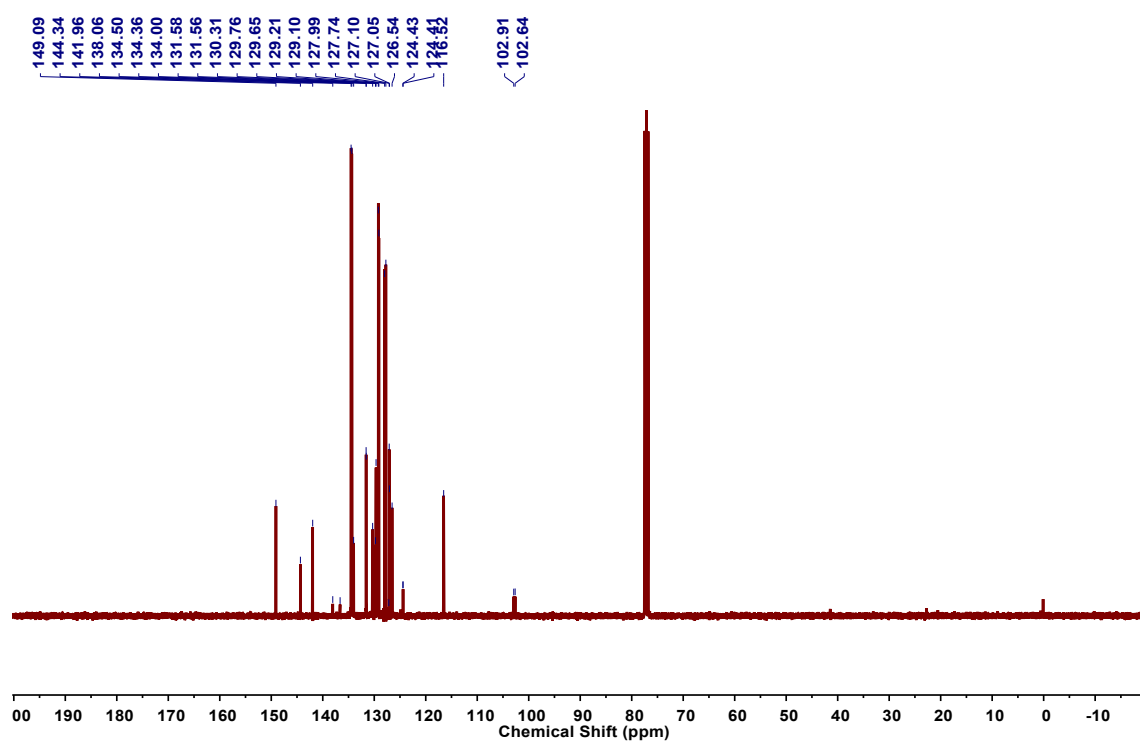

Fig. S46  $^{13}\text{C}$  NMR spectrum (100 MHz,  $\text{CDCl}_3$ , 298 K) of **1b**.

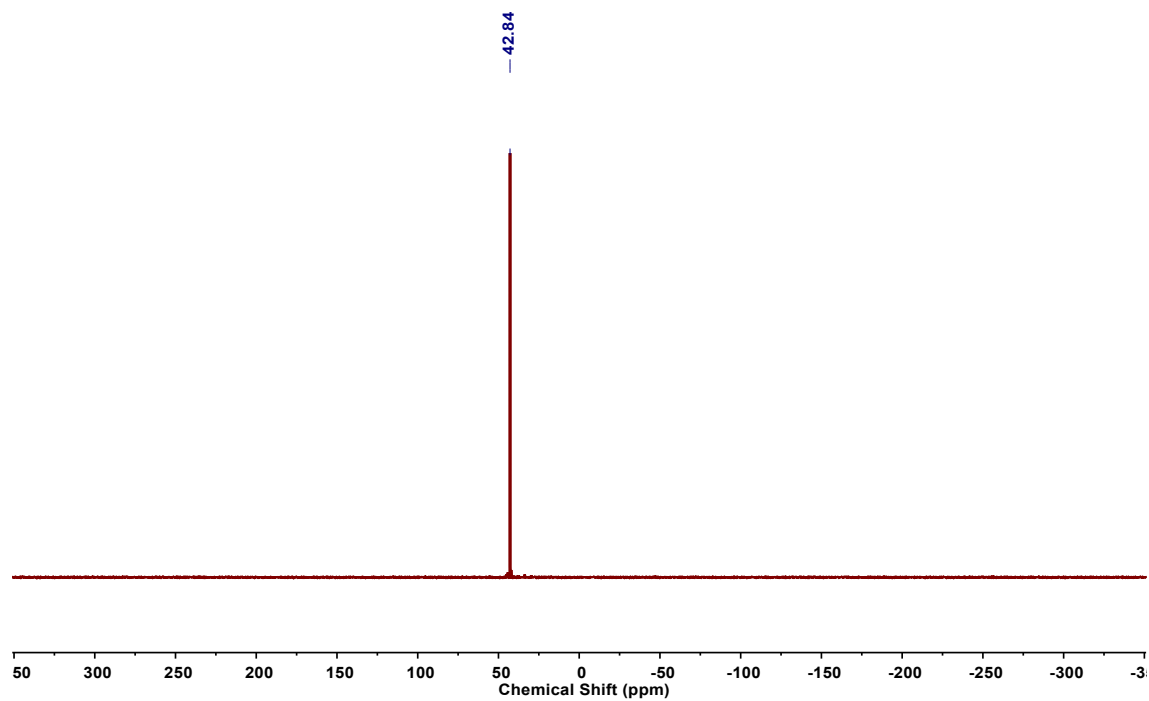

Fig. S47  $^{31}\text{P}$  NMR spectrum (162 MHz,  $\text{CDCl}_3$ , 298 K) of **1b**.



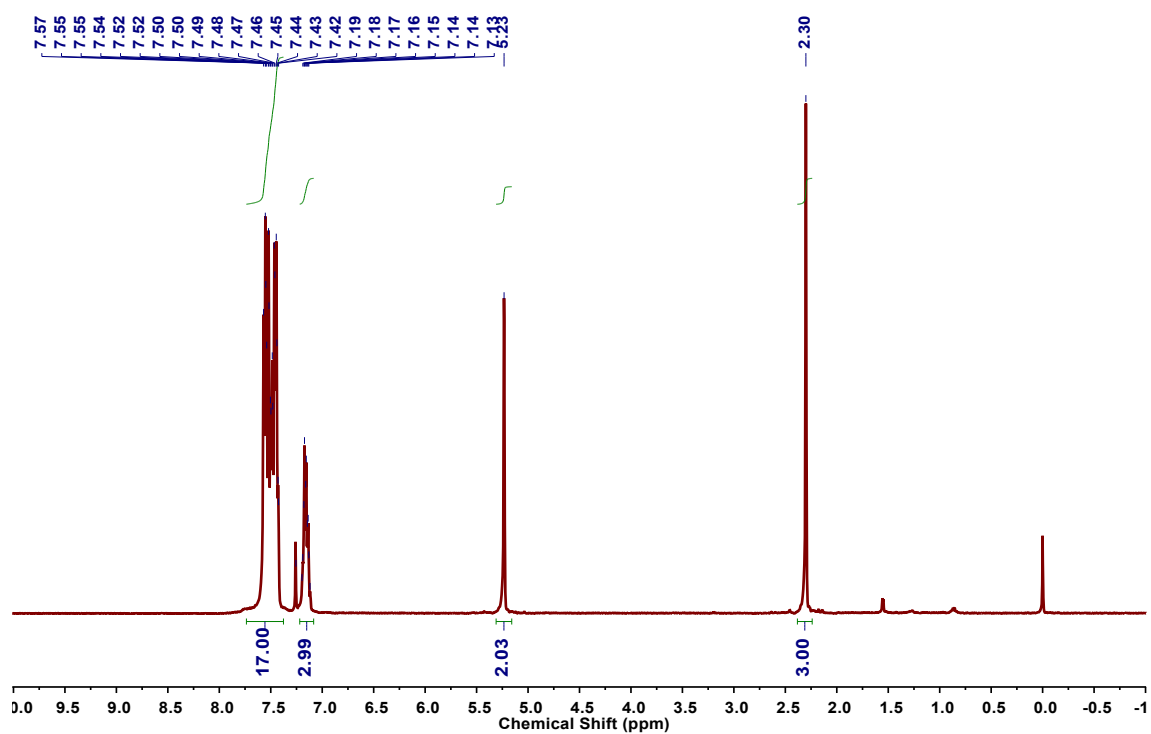

Fig. S48  $^1\text{H}$  NMR spectrum (400 MHz,  $\text{CDCl}_3$ , 298 K) of **1c**.

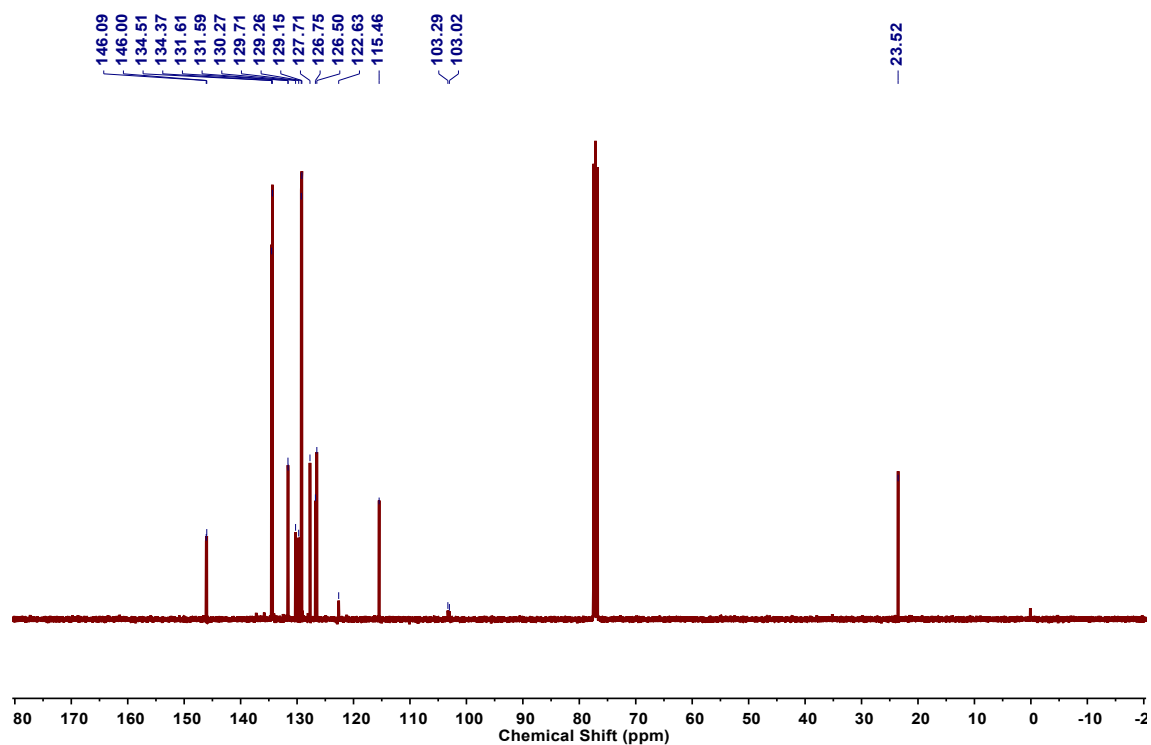

Fig. S49  $^{13}\text{C}$  NMR spectrum (100 MHz,  $\text{CDCl}_3$ , 298 K) of **1c**.

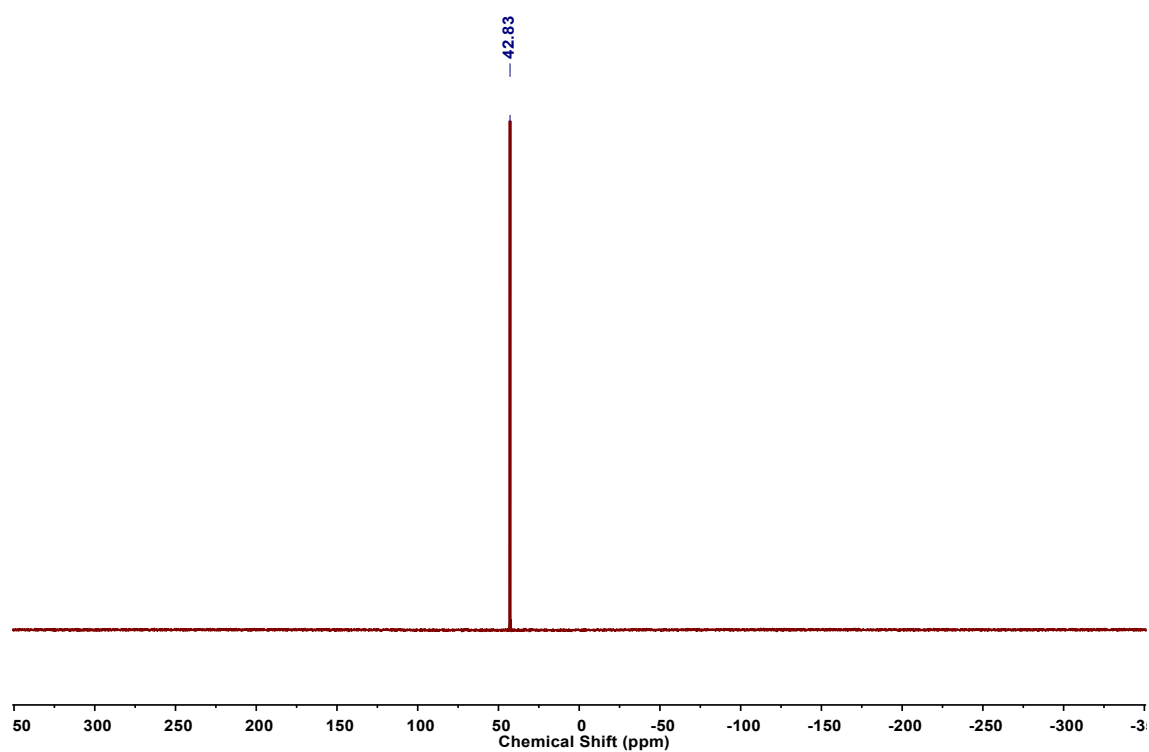

Fig. S50  $^{31}\text{P}$  NMR spectrum (162 MHz,  $\text{CDCl}_3$ , 298 K) of **1c**.

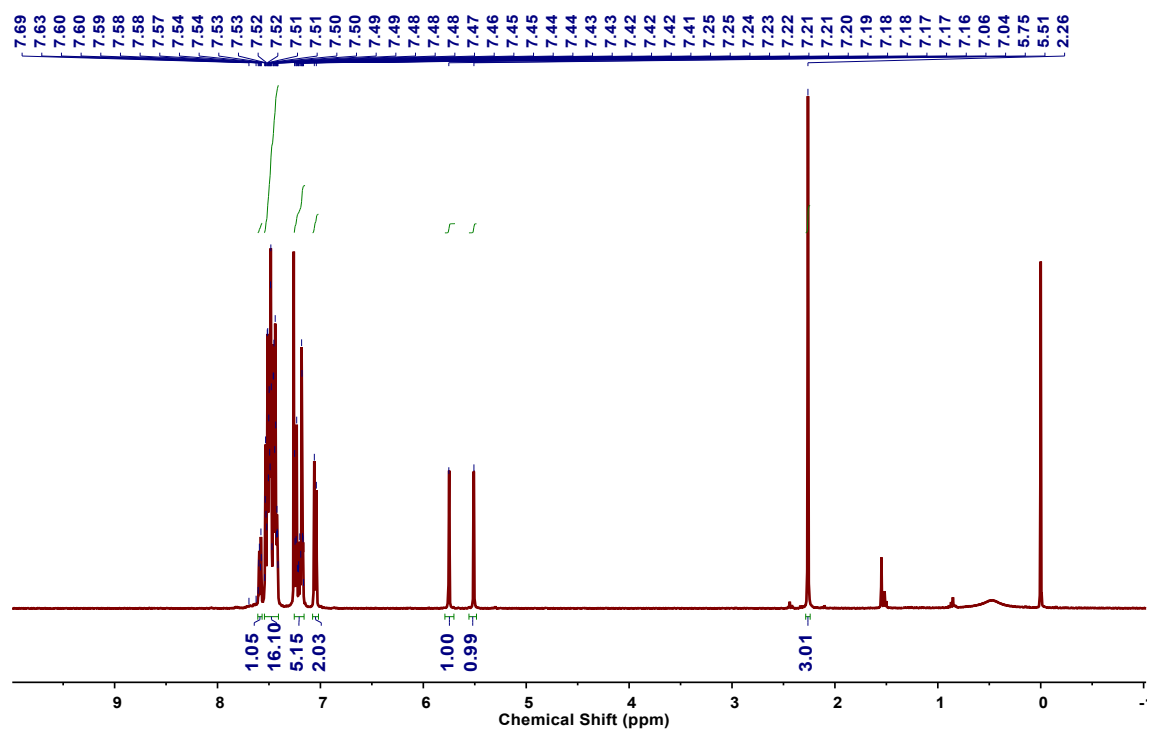

Fig. S51  $^1\text{H}$  NMR spectrum (400 MHz,  $\text{CDCl}_3$ , 298 K) of **1b'**.

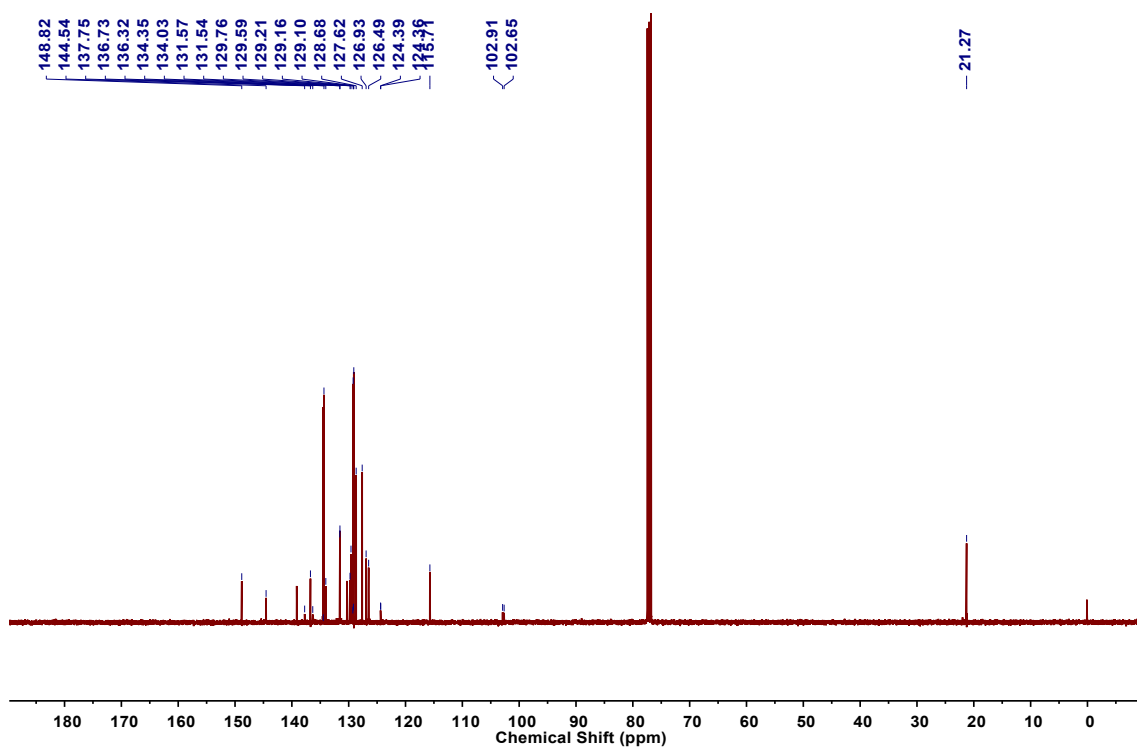

Fig. S52  $^{13}\text{C}$  NMR spectrum (100 MHz,  $\text{CDCl}_3$ , 298 K) of **1b'**.

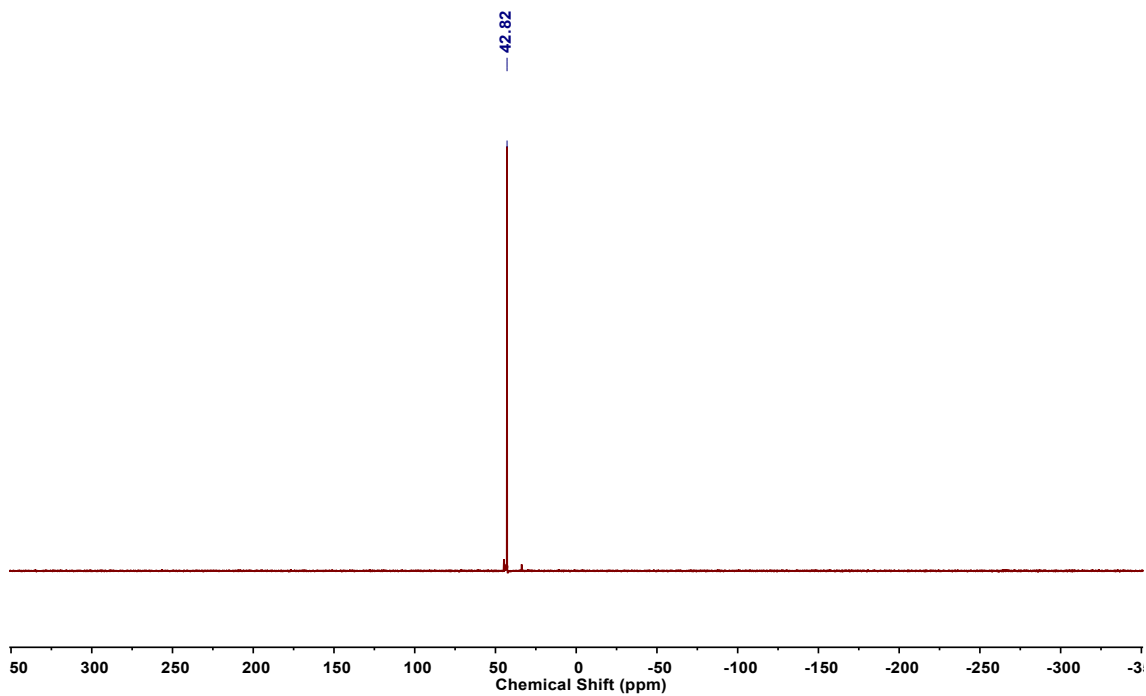

Fig. S53  $^{31}\text{P}$  NMR spectrum (162 MHz,  $\text{CDCl}_3$ , 298 K) of **1b'**.

### Supplementary References.

- 1 Y. Suzuki, S. Naoe, S. Oishi, N. Fujii and H. Ohno, *Org. Lett.*, 2012, **14**, 326-329.
- 2 R. K. Mohamed, S. Mondal, J. V. Guerrero, T. M. Eaton, T. E. Albrecht-Schmitt, M. Shatruk and I. V. Alabugin, *Angew. Chem. Int. Ed.*, 2016, **55**, 12054-12058.
- 3 S. V. Gagnier and R. C. Larock, *J. Am. Chem. Soc.*, 2003, **125**, 4804-4807.
- 4 J. Aziz, G. Frison, P. Le Menez, J.-D. Brion, A. Hamze and M. Alami, *Adv. Synth. Catal.*, 2013, **355**, 3425-3436.
- 5 S. García-Rubín, C. González-Rodríguez, C. García-Yebra, J. A. Varela, M. A. Esteruelas and C. Saá, *Angew. Chem. Int. Ed.*, 2014, **53**, 1841-1844.
- 6 K. Shibasaki and H. Togo, *Tetrahedron*, 2021, **79**, 131864.
- 7 B.-B. Zhu, W.-B. Ye, Z.-T. He, S.-S. Zhang, C.-G. Feng and G.-Q. Lin, *ACS Catal.*, 2021, **11**, 12123-12132.
- 8 T. Miura and N. Iwasawa, *J. Am. Chem. Soc.*, 2002, **124**, 518-519.
- 9 G. Sheldrick, *Acta Cryst. A*, 2008, **64**, 112-122.
- 10 O. V. Dolomanov, L. J. Bourhis, R. J. Gildea, J. A. K. Howard and H. Puschmann, *J. Appl. Cryst.*, 2009, **42**, 339-341.
- 11 (a) P. van der Sluis and A. L. Spek, *Acta Cryst. A*, 1990, **46**, 194-201; (b) A. Spek, *J. Appl. Cryst.*, 2003, **36**, 7-13.
- 12 M. E. Casida, *J. Mol. Struct. THEOCHEM*, 2009, **914**, 3-18.
- 13 P.-F. Li, C.-B. Yi, S.-J. Ren and J. Qu, *Adv. Synth. Catal.*, 2016, **358**, 2088-2092.
